# Supplementary material for: Utilisation of mammography by women with mobility impairment in the UK: secondary analysis of cross-sectional data
Source: PubMed Central journal article supplement — BMJ Open. 2019 Mar 15;9(3):e024571. doi: 10.1136/bmjopen-2018-024571 (PMC6429931; doi:10.1136/bmjopen-2018-024571), 2019-03-15
Supplement: bmjopen-2018-024571.draft_revisions.pdf [file bmjopen-2018-024571.draft_revisions.pdf]

# BMJ Open

BMJ Open is committed to open peer review. As part of this commitment we make the peer review history of every article we publish publicly available.

When an article is published we post the peer reviewers' comments and the authors' responses online. We also post the versions of the paper that were used during peer review. These are the versions that the peer review comments apply to.

The versions of the paper that follow are the versions that were submitted during the peer review process. They are not the versions of record or the final published versions. They should not be cited or distributed as the published version of this manuscript.

BMJ Open is an open access journal and the full, final, typeset and author-corrected version of record of the manuscript is available on our site with no access controls, subscription charges or pay-per-view fees (<http://bmjopen.bmj.com>).

If you have any questions on BMJ Open's open peer review process please email [editorial.bmjopen@bmj.com](mailto:editorial.bmjopen@bmj.com)

# BMJ Open

## Utilisation of mammography by women with mobility impairments in the United Kingdom: a secondary analysis of cross-sectional data

|                               |                                                                                                                                          |
|-------------------------------|------------------------------------------------------------------------------------------------------------------------------------------|
| Journal:                      | <i>BMJ Open</i>                                                                                                                          |
| Manuscript ID                 | bmjopen-2018-024571                                                                                                                      |
| Article Type:                 | Research                                                                                                                                 |
| Date Submitted by the Author: | 02-Jun-2018                                                                                                                              |
| Complete List of Authors:     | Rotarou, Elena; Universidad de Chile, Department of Economics<br>Sakellariou, Dikaios; Cardiff University, School of Healthcare Sciences |
| Keywords:                     | United Kingdom, women with mobility impairment, mammography, preventive services, cancer screening                                       |
|                               |                                                                                                                                          |

SCHOLARONE™  
Manuscripts

Review only

1  
2  
3 **Title: Utilisation of mammography by women with mobility impairments in the**  
4 **United Kingdom: a secondary analysis of cross-sectional data**  
5  
6  
7  
8  
9

10 Elena S. Rotarou<sup>1</sup> and Dikaios Sakellariou<sup>2</sup>  
11  
12  
13

14 <sup>1</sup> Elena S. Rotarou  
15

16 University of Chile, Department of Economics,  
17

18 Diagonal Paraguay 257, Office 1506, Santiago, 8330015, Chile  
19

20 Email: [erotarou@fen.uchile.cl](mailto:erotarou@fen.uchile.cl)  
21

22 Telephone number: (56-2) 978-3455  
23  
24  
25  
26

27 <sup>2</sup> Dikaios Sakellariou  
28

29 Corresponding author: Cardiff University, School of Healthcare Sciences,  
30

31 Eastgate House, Newport Road 35-43, Cardiff, CF24 0AB  
32

33 Email: [sakellarioud@cardiff.ac.uk](mailto:sakellarioud@cardiff.ac.uk)  
34

35 Telephone number: 02920687744  
36  
37  
38  
39

40 **Keywords:** women with mobility impairment; mammography; preventive services;  
41  
42 cancer screening; United Kingdom  
43  
44  
45

46 **Word count:** 3483  
47  
48  
49  
50  
51  
52  
53  
54  
55  
56  
57  
58  
59  
60

1  
2  
3 **Utilisation of mammography by women with mobility impairments**  
4 **in the United Kingdom: a secondary analysis of cross-sectional data**  
5  
6  
7  
8

9 **ABSTRACT**  
10

11 **Objectives:** Research has shown that people with physical disabilities report worse  
12 lower utilisation of preventive services. The aim of this study was to examine whether  
13 women with mobility impairments have lower odds of utilising mammography  
14 compared to women with no such impairment, and explore the factors that are  
15 associated with lower utilisation.  
16  
17  
18  
19  
20

21 **Setting and Participants:** We performed secondary analysis, using logistic  
22 regressions, of de-identified cross-sectional data from the European Health Interview  
23 Survey, Wave 2. The sample included 9,491 women from across the UK, 2,697 of  
24 whom had a mobility impairment. The survey method involved face-to-face and  
25 telephone interviews.  
26  
27  
28  
29  
30  
31  
32

33 **Outcome measures:** Self report of the last time a mammogram was undertaken.  
34

35 **Results:** Adjusting for various demographic and socioeconomic variables, women  
36 with mobility impairment had 1.3 times (CI 95%: .70-.92) lower odds of having a  
37 mammogram than women without mobility impairment. Concerning women with  
38 mobility impairment, married women had more than twice the odds of having a  
39 mammogram than women that had never been married (OR: 2.07, CI 95%: 1.49-  
40 2.88). Women from Scotland had 1.5 times (CI 95%: 1.08-2.10) higher odds of  
41 undertaking the test than women from England. Women with upper secondary  
42 education had 1.4 times (CI 95%: 1.10-1.67) higher odds of undergoing the test than  
43 women with primary or lower secondary education. Also, women from higher  
44 quintiles (third and fifth quintiles) had higher odds of utilising mammography, with  
45  
46  
47  
48  
49  
50  
51  
52  
53  
54  
55  
56  
57  
58  
59  
60

1  
2  
3 the women in the fifth quintile having 1.5 times (CI 95%: 1.02-2.15) higher odds than  
4  
5 women from the first quintile.

6  
7 **Conclusions:** In order to achieve equitable access to mammography for all women, it  
8  
9 is important to acknowledge the barriers that impede women with mobility  
10  
11 impairment from using the service. These barriers can refer to structural disadvantage,  
12  
13 such as lower income and employment rate, transportation barriers, or previous  
14  
15 negative experiences, among others.  
16

### 17 18 19 20 **Strengths and limitations of this study**

- 21  
22  
23 • This study is based on a nationally-representative sample of community-  
24  
25 dwelling women.
- 26  
27 • We use various demographic and socioeconomic variables to investigate the  
28  
29 association between these factors and mammography for women with mobility  
30  
31 impairment in the UK.
- 32  
33 • Outcome measures were self-reported, which might have introduced response  
34  
35 bias.
- 36  
37 • We cannot establish any causal links, due to the study's cross-sectional design.  
38  
39  
40  
41  
42  
43  
44  
45  
46  
47  
48  
49  
50  
51  
52  
53  
54  
55  
56  
57  
58  
59  
60

## INTRODUCTION

Research has shown that people with physical disabilities generally report worse access and utilisation of healthcare services, including preventive and screening services.[1-5] Several studies have evidenced how access to some cancer screening services can be compromised due to the presence of pre-existing physical disability.[6-11] A recent study in the UK showed that women with disabilities – including women with physical limitations – report worse access to healthcare compared to any other group, perhaps illustrating how gender and disability intersect to create structural disadvantage for disabled women.[3]

There are several reasons that have been associated with lower utilisation of healthcare services by people with disabilities, and for women in particular. These include, among other reasons, inaccessible healthcare facilities and/or equipment, lack of appropriate parking, lack of social support, and financial constraints, and the intersection of all these factors with gender-based structural disadvantage.[1,5, 8]

There are also several intangible barriers that negatively affect utilisation of healthcare service by disabled women; past negative experiences with healthcare professionals, being treated like a low-priority patient, not being adequately informed, or having their impairments ignored, are some of the reasons women give for the low utilisation of services, including mammography.[5-6]

Mammography is an important screening tool for breast cancer.[12] In well-resourced settings, which include most high-income countries, the World Health Organisation position paper on mammography recommends population-based screening every two years for all women aged 50-69 years.[12] Several countries, including the US, Norway, Denmark, and the UK implement such national screening programmes.[13-17] The evidence shows that population-wide screening could lead

1  
2  
3 to an increase of early-cancer diagnosis, with a concomitant decrease of late-stage  
4 diagnosis, hence leading to a mortality decrease.[12,18] However, a Cochrane  
5 systematic review showed that the benefits of mortality decrease might be outweighed  
6 by over-diagnosis rates and higher rates of aggressive treatment, both of which were  
7 attributed to mammography.[19]  
8  
9

10  
11  
12  
13 Most of the existing evidence suggests that women with disabilities have  
14 lower utilisation rates and worse access to mammography compared to women  
15 without disabilities.[8,10,20-23] Transportation, quality of the experience, and lack of  
16 appropriate information, are among the reasons given for this.[6,24] Several of these  
17 studies are small-scale studies, which although they give important insights into the  
18 experiences of women as they navigate the healthcare system, they do not allow any  
19 conclusions regarding utilisation of preventive services at a population level. A recent  
20 large prospective study showed that women with disabilities in England have lower  
21 odds of having a mammogram compared to women without a disability.[25] It is  
22 important to know which are the factors that affect the utilisation of preventive  
23 services across the United Kingdom, so that policies and targeted interventions can be  
24 implemented to address any inequalities.  
25  
26  
27  
28  
29  
30  
31  
32  
33  
34  
35  
36  
37  
38

39 In the United Kingdom, women between the ages of 50 and 70 are invited to  
40 undertake a mammogram every three years, as part of a national screening  
41 programme by the National Health Service (NHS).[26] While there is evidence for  
42 women in England,[25] little is known regarding mammography utilisation by women  
43 with physical impairments across the UK; it is not known whether there is a  
44 difference in the utilisation rates between them and women without any mobility  
45 impairments, nor which are some of the factors associated with these utilisation rates.  
46  
47  
48  
49  
50  
51  
52  
53  
54  
55  
56  
57  
58  
59  
60

1  
2  
3 In this article, we examine the utilisation of mammography by women with  
4 lower limb mobility impairments in the UK. We use this term to refer to women who  
5 report difficulty or inability to walk or climb stairs, as per the available data from the  
6 European Health Interview Survey (EHIS, Wave 2). Our aim is to examine whether  
7 women with lower limb mobility impairments have lower odds of utilising  
8 mammography compared to women with no such impairment, and explore the factors  
9 that are associated with lower utilisation.  
10  
11  
12  
13  
14  
15  
16  
17

18 This study seeks to add to the current body of evidence regarding utilisation of  
19 mammography by disabled women, by producing population-level evidence, and  
20 examining the association of a variety of demographic and socioeconomic factors –  
21 such as low income or lack of social support – with utilisation of mammography. This  
22 knowledge can inform policy and lead to the design of comprehensive support  
23 systems to enable real access to services, addressing not only the availability of  
24 services but also their utilisation.  
25  
26  
27  
28  
29  
30  
31  
32  
33  
34

## 35 **METHODOLOGY**

### 36 **Survey**

37 We performed secondary analysis, using logistic regressions, of de-identified cross-  
38 sectional data from the European Health Interview Survey, Wave 2. The EHIS  
39 collects health data across European Union member states, providing thus the  
40 possibility to compare health indicators between countries. It is administered every  
41 five years.[27]  
42  
43  
44  
45  
46  
47  
48  
49

50 The survey consists of four modules: a) demographic and socioeconomic  
51 variables, such as age, sex, marital status, employment, education, etc.; b) variables  
52 on health status, for example self-perceived general health, chronic conditions,  
53  
54  
55  
56  
57  
58  
59  
60



1  
2  
3 accidents, functional limitations in daily activities, etc.; c) variables on health care  
4 use, such as consultations, unmet healthcare needs, preventive services, etc.; and d)  
5 health determinants, for instance weight, smoking, alcohol consumption, exercise,  
6 social support, etc.[28] The survey analyses 21 areas of health concerns and health-  
7 related behaviours, and 81 specific item-questions. All measures are self-reported.[29]

8  
9 For more information on the EHIS questionnaire, please see:

10  
11 [http://ec.europa.eu/health/ph\\_information/implement/  
12  
13  
14  
15  
16  
17  
18  
19  
20  
21  
22  
23  
24  
25  
26  
27  
28  
29  
30  
31  
32  
33  
34  
35  
36  
37  
38  
39  
40  
41  
42  
43  
44  
45  
46  
47  
48  
49  
50  
51  
52  
53  
54  
55  
56  
57  
58  
59  
60](http://ec.europa.eu/health/ph_information/implement/wp/systems/docs/ev_20070315_ehis_en.pdf)  
wp/systems/docs/ev\_20070315\_ehis\_en.pdf.

The United Kingdom did not participate in the first EHIS wave (2006-2009), but it did take part in the second wave. Data was collected for residents in private households, over 16 years of age, residing in England, Wales, Scotland, and Northern Ireland. For Great Britain, data was collected between April 2013 and March 2014 by the Office for National Statistics. Data for Northern Ireland was collected between April and September 2014 by the Northern Ireland Statistics and Research Agency. In Great Britain, the survey was conducted as a follow-up to the Labour Force Survey; individuals who did not object in their final wave of contact, in the sampled households, completed the EHIS Wave 2 questionnaire. In Northern Ireland, a simple random sample of households on the Land and Property Services Agency property gazetteer was used. In total, the UK survey included 20,161 observations.[30]

The interviews involved both face-to-face (20%) and telephone interviews (80%). For the face-to-face interviews, the interviewers conducted Computer-Assisted Personal Interviews (CAPI) using laptops at the address of the respondents, while for the telephone interviews, Computer-Assisted Telephone Interviews (CATI) were conducted. The CAPI and CATI questionnaires were generally similar, with only minor changes to account for the different mode of interviewing.[30]

1  
2  
3 The microdata did not contain any personal information, such as names or  
4 addresses, which would allow direct identification. In order to ensure confidentiality,  
5 a set of anonymisation rules was applied.[31] Access to microdata is granted only for  
6 scientific purposes; we were granted access by the UK Data Service  
7 (www.ukdataservice.ac.uk).  
8  
9  
10  
11  
12

### 13 14 15 **Data and variables**

16  
17 There are two questions in the EHIS that measure mobile difficulty: a) variable PL6,  
18 “Difficulty in walking half a km on level ground without the use of any aid”, and b)  
19 variable PL7, “Difficulty in walking up or down 12 steps”. These two variables were  
20 merged into a new variable, called ‘mobility impairment’, with answers ‘without  
21 difficulty’ (women that answered that they had no difficulty in performing either  
22 tasks), and ‘with difficulty’ (women that replied that they had some difficulty in  
23 performing or were unable to do at least one of the tasks).  
24  
25  
26  
27  
28  
29  
30  
31  
32

33 Our dependent variable, “up to date with mammography”, was recoded and  
34 was binary, that is, ‘Yes’ (included the answers “within the last 12 months”, “1 to less  
35 than 2 years”, and “2 to less than 3 years”), and ‘No’ (“more than 3 years” and  
36 “never”). This recoding was done according to the NHS guidelines on  
37 mammography.[26] Previous research has also employed this variable, looking at  
38 women being up to date with mammography.[10]  
39  
40  
41  
42  
43  
44  
45

46 In total, we had 9,995 observations for women that answered the question on  
47 mammography. Due to case-deletion (default in STATA), our total sample size is  
48 9,491 observations (6,794 observations for women without mobility impairment, and  
49 2,697 for women with mobility impairment). Since only a very small percentage of  
50  
51  
52  
53  
54  
55  
56  
57  
58  
59  
60

1  
2  
3 observations was deleted, we decided not to proceed to maximum likelihood or  
4  
5 multiple imputation.[32]  
6

7 The control variables included the following: a) *age*: 20-49 / 50-69 / 70+  
8  
9 (while the target group is 50-69-year-old women, the survey showed a significant  
10 amount of women that for various, unspecified reasons decided to undertake a  
11 mammogram, despite being outside the target group); b) *civil status*: never married /  
12 married / widowed / divorced; c) *region*: England / Wales / Scotland / Northern  
13 Ireland; d) *urbanisation*: thinly-populated area / moderate-populated area / densely-  
14 populated area; e) *education*: primary and lower secondary / upper secondary / post-  
15 secondary and tertiary, short / tertiary; f) *income quintiles* (net monthly equivalised  
16 household income): 1<sup>st</sup> quintile / 2<sup>nd</sup> quintile / 3<sup>rd</sup> quintile / 4<sup>th</sup> quintile / 5<sup>th</sup> quintile; g)  
17 *employment*: unemployed / employed / inactive; h) *health self-assessment*: bad  
18 (answers 'bad' and 'very bad') / fair (answer 'fair') / good (answers 'good' and 'very  
19 good'); and i) *help from neighbours* (how easy it is to get help from neighbours in  
20 case of need): difficult / possible / easy.  
21  
22  
23  
24  
25  
26  
27  
28  
29  
30  
31  
32  
33  
34

35 All analyses were performed using STATA/MP version 14.2.  
36  
37  
38  
39

## 40 RESULTS

41  
42  
43 Table 1 summarises the characteristics of the study sample.  
44  
45  
46

47 **Table 1:** Comparison between women with and without mobility impairment  
48  
49

| Parameter | Women without mobility impairment (n=6,794) |   | Women with mobility impairment (n=2,697) |   | p value, chi-squared test |
|-----------|---------------------------------------------|---|------------------------------------------|---|---------------------------|
|           | n                                           | % | n                                        | % |                           |
|           |                                             |   |                                          |   |                           |

|                               |                                            |       |      |       |      |              |
|-------------------------------|--------------------------------------------|-------|------|-------|------|--------------|
| <b>Age groups</b>             |                                            |       |      |       |      |              |
|                               | 20-49 (n=3,270)                            | 2,919 | 43.0 | 351   | 13.0 | $p < 0.0001$ |
|                               | 50-69 (n=3,971)                            | 2,839 | 42.8 | 1,132 | 42.0 |              |
|                               | 70+ (n=2,250)                              | 1,036 | 15.3 | 1,214 | 45.1 |              |
| <b>Civil status</b>           |                                            |       |      |       |      |              |
|                               | Never married (n=1,515)                    | 1,259 | 18.5 | 256   | 9.5  | $p < 0.0001$ |
|                               | Married (n=5,386)                          | 4,097 | 60.3 | 1,289 | 47.8 |              |
|                               | Widowed (n=1,324)                          | 604   | 8.9  | 720   | 26.7 |              |
|                               | Divorced (n=1,266)                         | 834   | 12.3 | 432   | 16.0 |              |
| <b>Region</b>                 |                                            |       |      |       |      |              |
|                               | England (n=7,895)                          | 5,695 | 83.8 | 2,200 | 81.6 | $p < 0.0001$ |
|                               | Wales (n=421)                              | 269   | 4.0  | 152   | 5.6  |              |
|                               | Scotland (n=822)                           | 596   | 8.8  | 226   | 8.4  |              |
|                               | Northern Ireland (n=353)                   | 234   | 3.4  | 119   | 4.4  |              |
| <b>Urbanisation</b>           |                                            |       |      |       |      |              |
|                               | Thinly-populated area (n=1,322)            | 945   | 13.9 | 377   | 14.0 | $p = 0.992$  |
|                               | Moderate-populated area (n=2,575)          | 1,842 | 27.1 | 733   | 27.2 |              |
|                               | Densely-populated area (n=5,594)           | 4,007 | 59.0 | 1,587 | 58.8 |              |
| <b>Education</b>              |                                            |       |      |       |      |              |
|                               | Primary / lower secondary (n=3,040)        | 1,699 | 25.0 | 1,341 | 49.7 | $p < 0.0001$ |
|                               | Upper secondary (n=3,223)                  | 2,394 | 35.2 | 829   | 30.7 |              |
|                               | Post secondary / tertiary, short (n=1,495) | 1,156 | 17.0 | 339   | 12.6 |              |
|                               | Tertiary (n=1,733)                         | 1,545 | 22.7 | 188   | 7.0  |              |
| <b>Income quintiles</b>       |                                            |       |      |       |      |              |
|                               | 1 <sup>st</sup> quintile (n=1,962)         | 1,108 | 16.3 | 854   | 31.7 | $p < 0.0001$ |
|                               | 2 <sup>nd</sup> quintile (n=2,008)         | 1,336 | 19.7 | 672   | 24.9 |              |
|                               | 3 <sup>rd</sup> quintile (n=1,932)         | 1,352 | 19.9 | 580   | 21.5 |              |
|                               | 4 <sup>th</sup> quintile (n=1,852)         | 1,493 | 22.0 | 359   | 13.3 |              |
|                               | 5 <sup>th</sup> quintile (n=1,737)         | 1,505 | 22.2 | 232   | 8.6  |              |
| <b>Employment</b>             |                                            |       |      |       |      |              |
|                               | Unemployed (n=360)                         | 271   | 4.0  | 89    | 3.3  | $p < 0.0001$ |
|                               | Employed (n=4,304)                         | 3,836 | 56.5 | 468   | 17.4 |              |
|                               | Inactive (n=4,827)                         | 2,687 | 39.6 | 2,140 | 79.4 |              |
| <b>Health self-assessment</b> |                                            |       |      |       |      |              |
|                               | Bad (n=797)                                | 90    | 1.3  | 707   | 26.2 | $p < 0.0001$ |
|                               | Fair (n=1,896)                             | 774   | 11.4 | 1,122 | 41.6 |              |
|                               | Good (n=6,798)                             | 5,930 | 87.3 | 868   | 32.2 |              |
| <b>Help from neighbours</b>   |                                            |       |      |       |      |              |
|                               | Difficult (n=1,312)                        | 805   | 11.9 | 507   | 18.8 |              |

|                    |       |      |       |      |              |
|--------------------|-------|------|-------|------|--------------|
| Possible (n=1,923) | 1,426 | 21.0 | 497   | 18.4 | $p < 0.0001$ |
| Easy (n=6,256)     | 4,563 | 67.2 | 1,693 | 62.8 |              |

Some of the points presented in Table 1 are of particular interest. Firstly, concerning education, about half of women with mobility impairment had only primary or lower secondary education, as opposed to only a quarter of women without any mobility impairment; a much higher percentage of women from the latter group had also attended tertiary education. Secondly, more women with mobility impairment (32%) belonged to the first income quintile than women with no mobility impairment (16%). Less than 9% of women from the former group belonged to the richest segment; this percentage was more than 22% for women without any mobility impairment. Thirdly, the percentage of women with mobility impairment that were inactive was double (i.e. almost 80%) than that of women without any mobility problems. All these points underline the structural disadvantage faced by women with mobility impairment in the UK: lower education and lower income, coupled with a much higher likelihood of being inactive employment-wise.

Next, we performed logistic regressions to see whether there was any difference in utilisation rates of mammography between women with and without mobility impairment in the UK, and to investigate the factors associated with such rates. The first logistic regression – which included all the variables of Table 1 – showed that women with mobility impairment had 1.3 times lower odds of undertaking a mammogram than women without mobility problems (OR: .80, 95% CI = .70-.92,  $p=.002$ ) (full results not presented here but available upon request).

Next, Table 2 presents possible factors associated with having a mammogram for women with mobility impairment in the UK. Model (1) presents age-adjusted odds

ratios. Model (2) incorporates other demographic and socioeconomic variables, while Model (3) presents the fully-adjusted odds ratios (includes all variables of Table 1).

**Table 2:** Factors associated with utilisation rates of mammography by women with mobility impairment in the UK

| Variables                                            | Model (1) |            | Model (2) |            | Model (3) |            |
|------------------------------------------------------|-----------|------------|-----------|------------|-----------|------------|
|                                                      | OR        | 95% CI     | OR        | 95% CI     | OR        | 95% CI     |
| <b>Age groups (20-49 as reference)</b>               |           |            |           |            |           |            |
| 50-69                                                | 11.57***  | 8.67-15.44 | 11.99***  | 8.78-16.38 | 12.12***  | 8.85-16.61 |
| 70+                                                  | 1.69***   | 1.27-2.25  | 1.96***   | 1.39-2.75  | 1.94***   | 1.37-2.74  |
| <b>Civil status (never married as reference)</b>     |           |            |           |            |           |            |
| Married                                              |           |            | 2.05***   | 1.48-2.85  | 2.07***   | 1.49-2.88  |
| Widowed                                              |           |            | .934      | .65-1.34   | .95       | .66-1.37   |
| Divorced                                             |           |            | 1.44      | 1.00-2.08  | 1.46*     | 1.01-2.12  |
| <b>Regions (England as reference)</b>                |           |            |           |            |           |            |
| Wales                                                |           |            | 1.00      | .68-1.48   | 1.01      | .68-1.49   |
| Scotland                                             |           |            | 1.48*     | 1.06-2.05  | 1.51*     | 1.08-2.10  |
| Northern Ireland                                     |           |            | .91       | .58-1.41   | .90       | .57-1.40   |
| <b>Urbanisation (thinly-populated as reference)</b>  |           |            |           |            |           |            |
| Intermediate-populated area                          |           |            | .89       | .67-1.19   | .90       | .67-1.20   |
| Densely-populated area                               |           |            | .77       | .59-1.01   | .77       | .59-1.01   |
| <b>Education (primary/lower secondary as ref.)</b>   |           |            |           |            |           |            |
| Upper secondary                                      |           |            | 1.33**    | 1.08-1.64  | 1.36**    | 1.10-1.67  |
| Post secondary and tertiary, short                   |           |            | 1.20      | .91-1.58   | 1.21      | .91-1.60   |
| Tertiary                                             |           |            | .88       | .61-1.28   | .88       | .60-1.28   |
| <b>Employment (unemployed as reference)</b>          |           |            |           |            |           |            |
| Employed                                             |           |            | .94       | .54-1.66   | .93       | .53-1.63   |
| Inactive                                             |           |            | 1.29      | .76-2.20   | 1.30      | .76-2.22   |
| <b>Income (1<sup>st</sup> quintile as reference)</b> |           |            |           |            |           |            |
| 2 <sup>nd</sup> quintile                             |           |            | 1.11      | .88-1.40   | 1.09      | .86-1.38   |
| 3 <sup>rd</sup> quintile                             |           |            | 1.32*     | 1.03-1.69  | 1.29**    | 1.01-1.66  |
| 4 <sup>th</sup> quintile                             |           |            | 1.18      | .87-1.59   | 1.18      | .87-1.60   |
| 5 <sup>th</sup> quintile                             |           |            | 1.46*     | 1.01-2.11  | 1.49**    | 1.02-2.15  |
| <b>Health self-assessment (bad as reference)</b>     |           |            |           |            |           |            |
| Fair                                                 |           |            |           |            | 1.14      | .91-1.42   |
| Good                                                 |           |            |           |            | 1.11      | .87-1.42   |
| <b>Support from neighbours (difficult as ref.)</b>   |           |            |           |            |           |            |

|                                | Possible |          | 1.08 | .81-1.45 |
|--------------------------------|----------|----------|------|----------|
|                                | Easy     |          | 1.07 | .85-1.35 |
| <b>Observations</b>            | 2,790    | 2,738    |      | 2,697    |
| <b>Pseudo R<sup>2</sup></b>    | 0.1636   | 0.1908   |      | 0.1923   |
| <b>Chi<sup>2</sup> (21)</b>    | 631.29   | 722.80   |      | 718.04   |
| <b>Prob&gt;Chi<sup>2</sup></b> | 0.0000   | 0.0000   |      | 0.0000   |
| <b>McFadden R<sup>2</sup></b>  | 0.162    | 0.179    |      | 0.180    |
| <b>Deviance</b>                | 3228.188 | 3066.311 |      | 3015.368 |
| <b>AIC</b>                     | 3234.188 | 3106.311 |      | 3063.368 |
| <b>BIC</b>                     | 3251.989 | 3224.610 |      | 3204.965 |

\*  $p < 0.05$ , \*\*  $p < 0.01$ , \*\*\*  $p < 0.001$

Due to a higher Mac Fadden R<sup>2</sup>, and lower deviance, and AIC and BIC values, Model (3) provided a better fit than the previous two models. There was no collinearity affecting the results, with mean variance inflation factor (VIF) of 2.21.

As it can be seen in Table 2, the target group for having a mammogram (i.e. the 50-69 group) was the one with the highest odds of undertaking it: women in this age subgroup had 12 times higher odds of having this screening than women in the 20-49 subgroup. Regarding civil status, married women had more than twice the odds of having a mammogram than women that had never been married; divorced women had 1.5 higher odds. Women with mobility impairment in Scotland had 1.5 times higher odds of having the mammogram than women in England. Women with upper secondary education were 1.4 times more likely to have a mammogram than women with primary or lower secondary education. Also, women from higher quintiles (third and fifth quintiles) had higher odds of undertaking the mammogram, with the women in the fifth quintile having 1.5 times higher odds than women from the first quintile.

## DISCUSSION

1  
2  
3 In this study, we investigated whether women with mobility impairment in the UK  
4 were less likely to be up to date with mammography compared to women with no  
5 mobility impairment, and explored some of the factors associated with lower  
6 utilisation. The results showed a statistically significant difference between women  
7 with and without mobility impairment, with women with mobility impairment having  
8 1.3 times lower odds of undertaking a mammogram than women without mobility  
9 problems. Furthermore, the results showed a positive association between married  
10 civil status, high income, educational attainment, and living in Scotland, and being up  
11 to date with mammography.  
12  
13  
14  
15  
16  
17  
18  
19  
20  
21

22 One of the strengths of the study is that it is based on data from a nationally-  
23 representative sample. It also adds to the body of literature by examining the  
24 association of several factors with mammography utilisation for women with mobility  
25 impairment, an issue that has been generally little explored, particularly in the UK.  
26 One of the limitations of the study is that while we have established associations  
27 between various factors and utilisation of mammography by women with mobility  
28 impairment, we cannot infer causality due to the cross-sectional nature of the data.  
29 Another limitation of the study is that there is no information in the EHIS on the  
30 reasons that influence utilisation of mammography. Furthermore, the EHIS relies on  
31 self-reporting information, which leaves the instrument open to response bias;  
32 however, there is no relevant information on this aspect. Another limitation of the  
33 study is the way mobility impairment was defined, which potentially included women  
34 with only short-term impairment, together with women with longer-term impairment;  
35 this might have had an impact on external validity.  
36  
37  
38  
39  
40  
41  
42  
43  
44  
45  
46  
47  
48  
49  
50  
51

52 The findings showed that women with mobility impairment had 1.3 lower  
53 odds of being up to date with mammography. This is consistent with previous  
54  
55  
56  
57  
58  
59  
60



1  
2  
3 research that shows that in the UK, there are long-standing inequalities between  
4  
5 people's cancer experiences.[33] This finding is also consistent with research findings  
6  
7 from a study in England. [25] Bone et al. performed an analysis of data from the  
8  
9 National Cancer Patient Experience Survey.[34] They analysed data from 71,793  
10  
11 cancer patients and found evidence that cancer patients with long-standing conditions  
12  
13 in England, including people with physical conditions and disabilities, reported poorer  
14  
15 care. These inequalities persisted even when controlling for other factors. Further to  
16  
17 this, people with pre-existing disability diagnosed with cancer report low satisfaction  
18  
19 and use of services.[7-8, 35] As Liu and Clark have shown, quality of the experience  
20  
21 matters;[36] previous negative experiences with mammography might deter women  
22  
23 with physical impairments from undertaking the test in the future.  
24  
25

26  
27 These inequalities in the experiences of patients with cancer in the UK conflict  
28  
29 with several of the recommendations of recent strategic documents, including  
30  
31 'Achieving world-class cancer outcomes: a Strategy for England 2015-2020' and the  
32  
33 Cancer Delivery Plan for Wales.[37,38] Both documents call for access to equitable  
34  
35 care, achieving the best experience, and promoting delivery of cancer care responsive  
36  
37 to individual needs.  
38

39  
40 The findings also showed that married women had higher odds of having a  
41  
42 mammogram than women that had never been married. This result is in accordance  
43  
44 with evidence demonstrating the protective role of married civil status.[23,39] Indeed,  
45  
46 married people tend to have more fixed residence, regular doctors, and fixed  
47  
48 healthcare places, and therefore are more likely to be informed and accept preventive  
49  
50 health services than unmarried people.[39] They have also a stronger social network  
51  
52 (for example, family members, relatives, and friends) that can offer them more  
53  
54  
55  
56  
57  
58  
59  
60

1  
2  
3 emotional and practical support (for instance, transportation) to attend such  
4  
5 screenings, as well as help them adopt healthier behaviours.  
6

7  
8 Our study also revealed that there are differences in the utilisation rates of  
9  
10 mammography between women living in different regions in the United Kingdom,  
11  
12 with women with mobility impairment living in Scotland having higher odds of  
13  
14 undertaking the test than women in England. The reason behind this might be the  
15  
16 usage of mobile screening units in Scotland, which appears to enable access to  
17  
18 mammography for underserved populations.[40]  
19

20  
21 Furthermore, our study showed that women with mobility impairments with a  
22  
23 higher education had higher odds of having a mammogram than women with primary  
24  
25 or lower secondary education. Women with mobility impairment that belonged to  
26  
27 higher quintiles had also higher odds of having a mammogram than women belonging  
28  
29 to the first quintile. This result agrees with previous research that found that disabled  
30  
31 women with higher education and an overall higher socioeconomic status were more  
32  
33 likely to undertake preventive exams.[41-42] Educational attainment beyond upper  
34  
35 secondary did not seem to have any further positive effect on the uptake of  
36  
37 mammography.  
38

39  
40 Overall, taking into account the global demographic, epidemiological, and  
41  
42 socioeconomic changes – including ageing, urbanisation, reduction in morbidity and  
43  
44 mortality rates, and increase in chronic diseases – it is essential that preventive health  
45  
46 services are better promoted and reach all people, especially disadvantaged groups,  
47  
48 such as people with disabilities, women, and the poor. The WHO position paper on  
49  
50 mammography states that:  
51

52  
53 “Population-based screening programmes identify and individually invite each  
54  
55 person in the eligible population to attend each round of screening so that each  
56  
57  
58  
59

1  
2  
3 person in the eligible population has an equal chance of benefiting from  
4  
5 screening.” (p.23).[12]  
6

7 This statement, however, overlooks the fact that not everyone has an equal chance of  
8  
9 benefitting from screening; people with mobility impairment may, for example, face  
10  
11 transportation barriers, which could stop them from accessing screening services,  
12  
13 despite their availability. Women with mobility impairment, and disabilities in  
14  
15 general, are further disadvantaged, as they also face structural disadvantage – in the  
16  
17 form of lower education, lower income, and greater poverty – than men, as shown in  
18  
19 this study and supported by a body of existing research.[43-44] In order to enhance  
20  
21 the utilisation of mammography (and possibly the use of other preventive services), it  
22  
23 is important to acknowledge the barriers that stop women from using the service and  
24  
25 adopt measures that would lead to a more equitable utilisation.  
26  
27  
28  
29  
30

### 31 **Contributors**

32  
33 ESR and DS jointly conceived the final research question and aims and objectives,  
34  
35 reviewed the literature, produced the analysis plan and carried out the analysis, and  
36  
37 drafted the manuscript.  
38

### 39 **Funding**

40  
41 None declared.  
42  
43

### 44 **Competing interests**

45  
46 None declared.  
47

### 48 **Ethics approval**

49  
50 None required.  
51

### 52 **Data sharing statement**

53  
54  
55  
56  
57  
58  
59  
60

1  
2  
3 Technical appendix and dataset available from the UK Data Service.  
4

5 <https://discover.ukdataservice.ac.uk/catalogue/?sn=7881>  
6  
7  
8  
9  
10  
11  
12  
13  
14  
15  
16  
17  
18  
19  
20  
21  
22  
23  
24  
25  
26  
27  
28  
29  
30  
31  
32  
33  
34  
35  
36  
37  
38  
39  
40  
41  
42  
43  
44  
45  
46  
47  
48  
49  
50  
51  
52  
53  
54  
55  
56  
57  
58  
59  
60

## References

- 1 Iezzoni LI, McCarthy EP, Davis RB, et al. Mobility impairments and use of screening and preventive services. *Am J Public Health* 2000;90(6):955.
- 2 Kroll T, Jones GC, Kehn M, et al. Barriers and strategies affecting the utilisation of primary preventive services for people with physical disabilities: a qualitative inquiry. *Health Soc Care Community* 2006;14(4):284-93.
- 3 Sakellariou D, Rotarou ES. Access to healthcare for men and women with disabilities in the UK: secondary analysis of cross-sectional data. *BMJ Open* 2017;7(8):e016614. doi: 10.1136/bmjopen-2017-016614. (accessed 23 May 2018).
- 4 Popplewell NT, Rechel BP, Abel GA. How do adults with physical disability experience primary care? A nationwide cross-sectional survey of access among patients in England. *BMJ Open* 2014;4:e004714. doi: <http://bmjopen.bmj.com/content/4/8/e004714> (accessed 23 May 2018).
- 5 Gibson J, O'Connor R. Access to health care for disabled people: a systematic review. *Social Care and Neurodisability* 2010;1:21-31.
- 6 Llewellyn G, Balandin S, Poulos A, et al. Disability and mammography screening: intangible barriers to participation. *Disabil Rehabil* 2011;33(19-20):1755-1767.
- 7 Angus J, Seto L, Barry N, et al. Access to cancer screening for women with mobility disabilities. *J of Cancer Educ* 2012;27(1):75-82.
- 8 Peters K, Cotton A. Barriers to breast cancer screening in Australia: Experiences of women with physical disabilities. *J Clin Nurs* 2015;24(3-4):563-572.
- 9 Devaney J, Seto L, Barry N, et al. Navigating healthcare: gateways to cancer screening. *Disabil Soc* 2009;24(9):739-751.

- 1  
2  
3 10 Horner-Johnson W, Dobbertin K, Andresen EM, et al. Breast and cervical cancer  
4 screening disparities associated with disability severity. *Womens Health Issues*  
5 2014;24(1):e147-53.  
6  
7  
8  
9 11 Iezzoni LI, McCarthy EP, Davis RB, et al. Use of screening and preventive  
10 services among women with disabilities. *Am J Med Qual* 2001;16(4):135-44.  
11  
12 12 World Health Organization. WHO Position Paper On Mammography Screening.  
13 World Health Organization; 2014.  
14  
15  
16  
17 13 Weedon-Fekjær H, Romundstad PR, Vatten LJ. Modern mammography screening  
18 and breast cancer mortality: population study. *BMJ* 2014;348:g3701.  
19  
20  
21  
22 14 Bleyer A, Welch HG. Effect of three decades of screening mammography on  
23 breast-cancer incidence. *N Engl J Med* 2012;367(21):1998-2005.  
24  
25  
26 15 Broeders M, Moss S, Nyström L, et al. The impact of mammographic screening on  
27 breast cancer mortality in Europe: a review of observational studies. *J Med Screen*  
28 2012;19(1\_suppl):14-25.  
29  
30  
31  
32 16 Jørgensen KJ, Zahl PH, Gøtzsche PC. Breast cancer mortality in organised  
33 mammography screening in Denmark: comparative study. *BMJ* 2010;340:c1241.  
34  
35  
36  
37 17 Rafia R, Brennan A, Madan J, et al. Modeling the cost-effectiveness of alternative  
38 upper age limits for breast cancer screening in England and Wales. *Value Health*  
39 2016;19(4):404-12.  
40  
41  
42  
43 18 Kerlikowske K, Grady D, Rubin SM, et al. Efficacy of screening mammography: a  
44 meta-analysis. *JAMA* 1995;273(2):149-54.  
45  
46  
47  
48 19 Gøtzsche PC, Jørgensen KJ. Screening for breast cancer with mammography.  
49 *Cochrane Database Syst Rev*;2013;6: CD001877.  
50  
51  
52 20 Todd A, Stuijbergen A. Breast cancer screening barriers and disability. *Rehabil*  
53 *Nurs* 2012;37(2):74-9.  
54  
55  
56  
57  
58  
59  
60

1  
2  
3 21 Iezzoni LI, Kilbridge K, Park ER. Physical access barriers to care for diagnosis  
4 and treatment of breast cancer among women with mobility impairments. *Oncol Nurs*  
5 *Forum* 2010;37:711.  
6  
7

8  
9 22 Iezzoni LI, Park ER, Kilbridge KL. Implications of mobility impairment on the  
10 diagnosis and treatment of breast cancer. *J Womens Health* 2011;20(1):45-52.  
11  
12

13 23 Sakellariou D, Rotarou ES. Utilisation of cancer screening services by disabled  
14 women in Chile. *PloS One* 2017;12(5):e0176270.  
15  
16

17  
18 <https://doi.org/10.1371/journal.pone.0176270> (accessed 23 May 2018).  
19

20 24 Barr JK, Giannotti TE, Hoof TJ, et al. Understanding barriers to participation in  
21 mammography by women with disabilities. *Am J Health Promot* 2008;22(6):381-5.  
22  
23

24 25 Floud S, Barnes I, Verfürden M, et al. Disability and participation in breast and  
25 bowel cancer screening in England: a large prospective study. *Br J Cancer* 2017  
26  
27 Nov;117(11):1711.  
28  
29

30 26 National Health Service. Breast Cancer Screening.  
31  
32

33 <https://www.nhs.uk/conditions/breast-cancer-screening/> (accessed 29 May 2018).  
34  
35

36 27 Eurostat. European Health Interview Survey (EHIS). Description of the dataset.  
37  
38

39 No date. <http://ec.europa.eu/eurostat/web/microdata/european-health-interview-survey>  
40 (accessed 17 May 2018).  
41  
42

43 28 Eurostat. European Health Interview Survey (EHIS wave 2). Methodological  
44 manual. Eurostat Methodologies and Working Papers. Luxembourg: Publications  
45 Office of the European Union 2013.  
46  
47

48 29 Office for National Statistics. Health indicators for the United Kingdom and its  
49 constituent countries based on the 2013 to 2014 European Health Interview Survey,  
50 (Wave 2) 2015. <http://webarchive.nationalarchives.gov.uk/> (accessed 23 May 2018).  
51  
52  
53  
54  
55  
56  
57  
58  
59  
60

1  
2  
3 30 Office for National Statistics, Northern Ireland Statistics and Research Agency.  
4  
5 *European Health Interview Survey: United Kingdom Data, Wave 2, 2013-2014*. UK  
6  
7 Data Service SN: 7881 2016 <https://discover.ukdataservice.ac.uk/catalogue/?sn=7881>  
8  
9 (accessed 17 May 2018).

10  
11 31 Eurostat. European Health Interview Survey (EHIS). Reference Metadata in Euro  
12  
13 SDMX Metadata Structure (ESMS). 2016.  
14  
15 [http://ec.europa.eu/eurostat/cache/metadata/en/hlth\\_det\\_esms.htm#conf14728059019](http://ec.europa.eu/eurostat/cache/metadata/en/hlth_det_esms.htm#conf14728059019)  
16  
17 [15](#) (accessed 20 May 2018).

18  
19 32 Allison P. Listwise deletion: It's NOT evil. Statistical Horizons.  
20  
21 <http://statisticalhorizons.com/listwise-deletion-its-not-evil> (accessed 30 May 2018).  
22  
23 33 All Party Parliamentary Group on Cancer. Report of the All Party Parliamentary  
24  
25 Group on Cancer's Inquiry into Inequalities in Cancer. Cardiff: Welsh Government  
26  
27 2009.  
28  
29 [http://www.macmillan.org.uk/Documents/Campaigns/InquiryintoInequalitiesReport.p](http://www.macmillan.org.uk/Documents/Campaigns/InquiryintoInequalitiesReport.pdf)  
30  
31 [df](#) (accessed 30 May 2018).  
32  
33

34 34 Bone A, Mc Grath-Lone L, Day S, et al. Inequalities in the care  
35  
36 experiences of patients with cancer: Analysis of data from the National Cancer Patient  
37  
38 Experience Survey 2011-2012. *BMJ Open* 2014;4:e004567. doi: 10.1136/bmjopen-  
39  
40 2013-004567 (accessed 30 May 2018).  
41  
42

43 35 Merten J W. Barriers to cancer screening for people with disabilities: A literature  
44  
45 review. *Disabil Health J* 2015;8(1):9-16.  
46  
47

48 36 Liu SY, Clark MA. Breast and cervical cancer screening practices among disabled  
49  
50 women aged 40-75: does quality of the experience matter? *J Womens Health*  
51  
52 2008;7(8):1321-9.  
53  
54  
55  
56  
57  
58  
59  
60



1  
2  
3 37. Independent Cancer Taskforce. Achieving World-Class Cancer Outcomes: a  
4 Strategy for England 2015-2020. 2016. [http://www.cancerresearchuk.org/about-](http://www.cancerresearchuk.org/about-us/cancer-strategy-in-england)  
5 [us/cancer-strategy-in-england](http://www.cancerresearchuk.org/about-us/cancer-strategy-in-england)  
6  
7

8  
9 (accessed 30 May 2018).  
10

11 38. Welsh Government. Together for Health- Cancer Delivery Plan; A Delivery Plan  
12 up to 2016 for NHS Wales and its Partners. Cardiff: Welsh Government 2012.  
13

14  
15 39 Yen SM, Kung PT, Tsai WC. Factors associated with free adult preventive health  
16 care utilization among physically disabled people in Taiwan: nationwide population-  
17 based study. *BMC Health Serv Res* 2014;4(1):610.  
18  
19

20  
21 40 Leung J, Macleod C, McLaughlin D, Woods LM, et al. Screening mammography  
22 uptake within Australia and Scotland in rural and urban populations. *Prev Med Rep*  
23 2015;2:559-62.  
24  
25

26  
27 41 Hewitt M, Devesa SS, Breen N. Cervical cancer screening among US women:  
28 analyses of the 2000 National Health Interview Survey. *Prev Med* 2004;39(2):270-8.  
29  
30

31 42 Rodríguez MA, Ward LM, Pérez-Stable EJ. Breast and cervical cancer screening:  
32 impact of health insurance status, ethnicity, and nativity of Latinas. *Ann Fam Med*  
33 2005;3(3):235-41.  
34  
35

36  
37 43 Yeo R, Moore K. Including disabled people in poverty reduction work: “Nothing  
38 about us, without us”. *World Dev* 2003;31(3):571-90.  
39  
40

41  
42 44 Pinto PC. Women, disability, and the right to health. In *Gender and Women's*  
43 *Studies: Critical Terrain*. M Hobbs, C Rice, eds. Toronto: Women’s Press 2018;465-  
44 479.  
45  
46  
47  
48  
49  
50  
51  
52  
53  
54  
55  
56  
57  
58  
59  
60

STROBE Statement—Checklist of items that should be included in reports of *cross-sectional studies*

|                          | Item No          | Recommendation                                                                                                                                                                                                 |
|--------------------------|------------------|----------------------------------------------------------------------------------------------------------------------------------------------------------------------------------------------------------------|
| Title and abstract       | X 1              | X p.1 (a) Indicate the study's design with a commonly used term in the title or the abstract                                                                                                                   |
|                          |                  | X p.2 (b) Provide in the abstract an informative and balanced summary of what was done and what was found                                                                                                      |
| <b>Introduction</b>      |                  |                                                                                                                                                                                                                |
| Background/rationale     | X p.4-5 2        | Explain the scientific background and rationale for the investigation being reported                                                                                                                           |
| Objectives               | X p.6 3          | State specific objectives, including any prespecified hypotheses                                                                                                                                               |
| <b>Methods</b>           |                  |                                                                                                                                                                                                                |
| Study design             | X p.2, p.6 4     | Present key elements of study design early in the paper                                                                                                                                                        |
| Setting                  | X p.6-7 5        | Describe the setting, locations, and relevant dates, including periods of recruitment, exposure, follow-up, and data collection                                                                                |
| Participants             | X p. 7-8 6       | (a) Give the eligibility criteria, and the sources and methods of selection of participants                                                                                                                    |
| Variables                | X p. 8-9 7       | Clearly define all outcomes, exposures, predictors, potential confounders, and effect modifiers. Give diagnostic criteria, if applicable                                                                       |
| Data sources/measurement | X p. 8-9 8*      | For each variable of interest, give sources of data and details of methods of assessment (measurement). Describe comparability of assessment methods if there is more than one group                           |
| Bias                     | X p. 14 9        | Describe any efforts to address potential sources of bias                                                                                                                                                      |
| Study size               | X p. 8-9 10      | Explain how the study size was arrived at                                                                                                                                                                      |
| Quantitative variables   | X p. 8-9 11      | Explain how quantitative variables were handled in the analyses. If applicable, describe which groupings were chosen and why                                                                                   |
| Statistical methods      | X 12             | X p. 6-8 (a) Describe all statistical methods, including those used to control for confounding                                                                                                                 |
|                          |                  | (b) Describe any methods used to examine subgroups and interactions                                                                                                                                            |
|                          |                  | X p.8-9 (c) Explain how missing data were addressed                                                                                                                                                            |
|                          |                  | (d) If applicable, describe analytical methods taking account of sampling strategy                                                                                                                             |
|                          |                  | (e) Describe any sensitivity analyses                                                                                                                                                                          |
| <b>Results</b>           |                  |                                                                                                                                                                                                                |
| Participants             | X 13*            | X p. 8 (a) Report numbers of individuals at each stage of study—eg numbers potentially eligible, examined for eligibility, confirmed eligible, included in the study, completing follow-up, and analysed       |
|                          |                  | (b) Give reasons for non-participation at each stage                                                                                                                                                           |
|                          |                  | (c) Consider use of a flow diagram                                                                                                                                                                             |
| Descriptive data         | X 14*            | X p.9-10 (a) Give characteristics of study participants (eg demographic, clinical, social) and information on exposures and potential confounders                                                              |
|                          |                  | (b) Indicate number of participants with missing data for each variable of interest                                                                                                                            |
| Outcome data             | X p. 8 15*       | Report numbers of outcome events or summary measures                                                                                                                                                           |
| Main results             | X p.12, p. 13 16 | X (a) Give unadjusted estimates and, if applicable, confounder-adjusted estimates and their precision (eg, 95% confidence interval). Make clear which confounders were adjusted for and why they were included |

|                          |                         |                                                                                                                                                                            |
|--------------------------|-------------------------|----------------------------------------------------------------------------------------------------------------------------------------------------------------------------|
|                          |                         | <b>X p.9</b> (b) Report category boundaries when continuous variables were categorized                                                                                     |
|                          |                         | (c) If relevant, consider translating estimates of relative risk into absolute risk for a meaningful time period                                                           |
| Other analyses           | 17                      | Report other analyses done—eg analyses of subgroups and interactions, and sensitivity analyses                                                                             |
| <b>Discussion</b>        |                         |                                                                                                                                                                            |
| Key results              | <b>X p.14</b><br>18     | Summarise key results with reference to study objectives                                                                                                                   |
| Limitations              | <b>X p.14</b><br>19     | Discuss limitations of the study, taking into account sources of potential bias or imprecision. Discuss both direction and magnitude of any potential bias                 |
| Interpretation           | <b>X p. 16-17</b><br>20 | Give a cautious overall interpretation of results considering objectives, limitations, multiplicity of analyses, results from similar studies, and other relevant evidence |
| Generalisability         | <b>X p.14</b><br>21     | Discuss the generalisability (external validity) of the study results                                                                                                      |
| <b>Other information</b> |                         |                                                                                                                                                                            |
| Funding                  | <b>X p.17</b><br>22     | Give the source of funding and the role of the funders for the present study and, if applicable, for the original study on which the present article is based              |

\*Give information separately for exposed and unexposed groups.

**Note:** An Explanation and Elaboration article discusses each checklist item and gives methodological background and published examples of transparent reporting. The STROBE checklist is best used in conjunction with this article (freely available on the Web sites of PLoS Medicine at <http://www.plosmedicine.org/>, Annals of Internal Medicine at <http://www.annals.org/>, and Epidemiology at <http://www.epidem.com/>). Information on the STROBE Initiative is available at [www.strobe-statement.org](http://www.strobe-statement.org).

# BMJ Open

## Utilisation of mammography by women with mobility impairments in the United Kingdom: a secondary analysis of cross-sectional data

|                                 |                                                                                                                                                                                                               |
|---------------------------------|---------------------------------------------------------------------------------------------------------------------------------------------------------------------------------------------------------------|
| Journal:                        | <i>BMJ Open</i>                                                                                                                                                                                               |
| Manuscript ID                   | bmjopen-2018-024571.R1                                                                                                                                                                                        |
| Article Type:                   | Research                                                                                                                                                                                                      |
| Date Submitted by the Author:   | 25-Nov-2018                                                                                                                                                                                                   |
| Complete List of Authors:       | Sakellariou, Dikaios; Cardiff University, School of Healthcare Sciences<br>Rotarou, Elena; Universidad de Chile, Centre of Environmental and<br>Natural Resource Economics, Faculty of Economics and Business |
| <b>Primary Subject Heading</b>: | Oncology                                                                                                                                                                                                      |
| Secondary Subject Heading:      | Public health, Epidemiology, Health services research, Patient-centred<br>medicine                                                                                                                            |
| Keywords:                       | United Kingdom, women with mobility impairment, mammography,<br>preventive services, cancer screening                                                                                                         |
|                                 |                                                                                                                                                                                                               |

SCHOLARONE™  
Manuscripts

1  
2  
3 **Title: Utilisation of mammography by women with mobility impairments in the**  
4  
5 **United Kingdom: a secondary analysis of cross-sectional data**  
6  
7  
8  
9  
10

11 Dikaios Sakellariou<sup>1</sup> and Elena S. Rotarou<sup>2</sup>  
12  
13

14  
15  
16 <sup>1</sup>Dikaios Sakellariou

17  
18 Corresponding author: Cardiff University, School of Healthcare Sciences,  
19

20 Eastgate House, Newport Road 35-43, Cardiff, CF24 0AB, UK  
21

22  
23 Email: [sakellarioud@cardiff.ac.uk](mailto:sakellarioud@cardiff.ac.uk)  
24

25 Telephone number: 02920687744  
26  
27

28  
29  
30 <sup>2</sup> Elena S. Rotarou

31  
32 University of Chile, Centre of Environmental and Natural Resource Economics,  
33

34 Faculty of Economics and Business,  
35

36 Diagonal Paraguay 257, Office 1506, Santiago, 8330015, Chile  
37

38  
39 Email: [erotarou@fen.uchile.cl](mailto:erotarou@fen.uchile.cl)  
40

41 Telephone number: (56-2) 978-3455  
42  
43  
44  
45

46 **Keywords:** women with mobility impairment; mammography; preventive services;  
47  
48 cancer screening; United Kingdom  
49  
50  
51

52 **Word count:** 3770  
53  
54  
55  
56  
57  
58  
59  
60

1  
2  
3 **Utilisation of mammography by women with mobility impairments**  
4  
5 **in the United Kingdom: a secondary analysis of cross-sectional data**  
6  
7  
8  
9

10 **ABSTRACT**

11  
12 **Objectives:** Research has shown that people with physical disabilities report lower  
13 utilisation of preventive services. The aim of this study was to examine whether  
14 women with mobility impairments have lower odds of utilising mammography  
15 compared to women with no such impairment, and explore the factors that are  
16 associated with lower utilisation.  
17  
18  
19  
20  
21  
22

23  
24 **Setting and Participants:** We performed secondary analysis, using logistic  
25 regressions, of de-identified cross-sectional data from the European Health Interview  
26 Survey, Wave 2. The sample included 9,491 women from across the UK, 2,697 of  
27 whom had mobility impairment. The survey method involved face-to-face and  
28 telephone interviews.  
29  
30  
31  
32  
33  
34

35 **Outcome measures:** Self-report of the last time a mammogram was undertaken.

36  
37 **Results:** Adjusting for various demographic and socioeconomic variables, women  
38 with mobility impairment had 1.3 times (CI 95%: .70-.92) lower odds of having a  
39 mammogram than women without mobility impairment. Concerning women with  
40 mobility impairment, married women had more than twice the odds of having a  
41 mammogram than women that had never been married (OR: 2.07, CI 95%: 1.49-  
42 2.88). Women from Scotland had 1.5 times (CI 95%: 1.08-2.10) higher odds of  
43 undertaking the test than women from England. Women with upper secondary  
44 education had 1.4 times (CI 95%: 1.10-1.67) higher odds of undergoing the test than  
45 women with primary or lower secondary education. Also, women from higher  
46 quintiles (third and fifth quintiles) had higher odds of utilising mammography, with  
47  
48  
49  
50  
51  
52  
53  
54  
55  
56  
57  
58  
59  
60

1  
2  
3 the women in the fifth quintile having 1.5 times (CI 95%: 1.02-2.15) higher odds than  
4  
5 women from the first quintile.  
6

7  
8 **Conclusions:** In order to achieve equitable access to mammography for all women, it  
9  
10 is important to acknowledge the barriers that impede women with mobility  
11  
12 impairment from using the service. These barriers can refer to structural disadvantage,  
13  
14 such as lower income and employment rate, transportation barriers, or previous  
15  
16 negative experiences, among others.  
17  
18

### 19 20 21 **Strengths and limitations of this study** 22

- 23  
24 • This study is based on a nationally-representative sample of community-  
25  
26 dwelling women.  
27
- 28  
29 • We use various demographic and socioeconomic variables to investigate the  
30  
31 association between these factors and mammography for women with mobility  
32  
33 impairment in the UK.  
34
- 35  
36 • Outcome measures were self-reported, which might have introduced response  
37  
38 bias.  
39
- 40  
41 • We cannot establish any causal links, due to the study's cross-sectional design.  
42  
43  
44  
45  
46  
47  
48  
49  
50  
51  
52  
53  
54  
55  
56  
57  
58  
59  
60

## INTRODUCTION

Research has shown that people with physical disabilities generally report worse access and utilisation of healthcare services, including preventive and screening services.[1-5] Several studies have evidenced how access to some cancer screening services can be compromised due to the presence of pre-existing physical disability.[6-11] A recent study in the UK showed that women with disabilities – including women with physical limitations – report worse access to healthcare compared to any other group, perhaps illustrating how gender and disability intersect to create structural disadvantage for disabled women.[3]

There are several reasons that have been associated with lower utilisation of healthcare services by people with disabilities, and for women in particular. These include, among other reasons, inaccessible healthcare facilities and/or equipment, lack of appropriate parking, lack of social support, and financial constraints, and the intersection of all these factors with gender-based structural disadvantage.[1,5, 8]

There are also several intangible barriers that negatively affect utilisation of healthcare services by disabled women; past negative experiences with healthcare professionals, being treated as a low-priority patient, not being adequately informed, or having their impairments ignored, are some of the reasons women give for the low utilisation of services, including mammography.[5-6]

Mammography is an important screening tool for breast cancer.[12] In well-resourced settings, which include most high-income countries, the World Health Organisation's position paper on mammography recommends population-based screening every two years for all women aged 50-69 years.[12] Several countries, including the US, Norway, Denmark, and the UK implement such national screening programmes.[13-17] A Cochrane systematic review showed that the benefits of



1  
2  
3 mortality decrease might be outweighed by over-diagnosis rates and higher rates of  
4 aggressive treatment, both of which were attributed to mammography.[18] However,  
5  
6 there is strong evidence showings that population-wide screening could lead to an  
7  
8 increase of early-cancer diagnosis, with a concomitant decrease of late-stage  
9  
10 diagnosis, hence leading to a mortality decrease.[12,19]  
11  
12  
13

14  
15 In the United Kingdom, women between the ages of 50 and 70 are invited to  
16  
17 undertake a mammogram every three years, as part of a national screening  
18  
19 programme by the National Health Service (NHS).[20] While there is evidence for  
20  
21 women in England,[21] little is known regarding mammography utilisation by women  
22  
23 with physical impairments across the UK; it is not known whether there is a  
24  
25 difference in the utilisation rates between women with and without any mobility  
26  
27 impairments, nor which are some of the factors associated with these utilisation rates.  
28  
29  
30

31  
32 Most of the existing evidence suggests that women with disabilities have  
33  
34 lower utilisation rates and worse access to mammography compared to women  
35  
36 without disabilities.[8,10,22-25] Transportation, quality of the experience, and lack of  
37  
38 appropriate information, are among the reasons given for this.[6,26] Several of these  
39  
40 studies are small-scale studies, which although they give important insights into the  
41  
42 experiences of women as they navigate the healthcare system, they do not allow any  
43  
44 conclusions regarding utilisation of preventive services at a population level. A recent  
45  
46 large prospective study showed that women with disabilities in England have lower  
47  
48 odds of having a mammogram compared to women without a disability.[21].  
49  
50

51  
52 In this article, we examine the utilisation of mammography by women with  
53  
54 lower limb mobility impairments in the UK. We use this term to refer to women who  
55  
56 report difficulty or inability to walk or climb stairs, as per the available data from the  
57  
58 European Health Interview Survey (EHIS, Wave 2). Our aim is to examine whether  
59  
60

1  
2  
3 women with lower limb mobility impairments have lower odds of utilising  
4  
5 mammography compared to women with no such impairment, and explore the factors  
6  
7 that are associated with lower utilisation.  
8  
9

10 This study seeks to add to the current body of evidence regarding utilisation of  
11  
12 mammography by disabled women, by producing population-level evidence, and  
13  
14 examining the association of a variety of demographic and socioeconomic factors –  
15  
16 such as low income or lack of social support – with utilisation of mammography. This  
17  
18 knowledge can inform policy and lead to the design of comprehensive support  
19  
20 systems and target interventions that would enable real access to services, addressing  
21  
22 not only the availability of services but also their utilisation.  
23  
24  
25  
26  
27

## 28 **METHODOLOGY**

### 29 **Survey**

30  
31 We performed secondary analysis, using logistic regressions, of de-identified cross-  
32  
33 sectional data from the European Health Interview Survey, Wave 2. The EHIS  
34  
35 collects health data of representative samples of population across European Union  
36  
37 member states, providing thus the possibility to compare health indicators between  
38  
39 countries. It is administered every five years.[27]  
40  
41  
42  
43  
44

45 The survey consists of four modules: a) demographic and socioeconomic  
46  
47 variables, such as age, sex, marital status, employment, education, etc.; b) variables  
48  
49 on health status, for example self-perceived general health, chronic conditions,  
50  
51 accidents, functional limitations in daily activities, etc.; c) variables on health care  
52  
53 use, such as consultations, unmet healthcare needs, preventive services, etc.; and d)  
54  
55 health determinants, for instance weight, smoking, alcohol consumption, exercise,  
56  
57 social support, etc.[28] The survey analyses 21 areas of health concerns and health-  
58  
59  
60

1  
2  
3 related behaviours, and 81 specific item-questions. All measures are self-reported.[29]

4  
5 For more information on the EHIS questionnaire, please refer to the survey

6  
7  
8 website.[27,28]

9  
10 The United Kingdom did not participate in the first EHIS wave (2006-2009),  
11  
12 but it did take part in the second wave. Data was collected for residents in private  
13  
14 households, over 16 years of age, residing in England, Wales, Scotland, and Northern  
15  
16 Ireland. For Great Britain, data was collected between April 2013 and March 2014 by  
17  
18 the Office for National Statistics. Data for Northern Ireland was collected between  
19  
20 April and September 2014 by the Northern Ireland Statistics and Research Agency. In  
21  
22 Great Britain, the survey was conducted as a follow-up to the Labour Force Survey;  
23  
24 individuals who did not object in their final wave of contact, in the sampled  
25  
26 households, completed the EHIS Wave 2 questionnaire. In Northern Ireland, a simple  
27  
28 random sample of households on the Land and Property Services Agency property  
29  
30 gazetteer was used. In total, the UK survey included 20,161 observations, a sample  
31  
32 size which was much higher than the estimated minimum effective size for the  
33  
34 country, which was 13,085.[30]

35  
36  
37  
38  
39 The interviews involved both face-to-face (20%) and telephone interviews  
40  
41 (80%). For the face-to-face interviews, the interviewers conducted Computer-Assisted  
42  
43 Personal Interviews (CAPI) using laptops at the address of the respondents, while for  
44  
45 the telephone interviews, Computer-Assisted Telephone Interviews (CATI) were  
46  
47 conducted. The CAPI and CATI questionnaires were generally similar, with only  
48  
49 minor changes to account for the different mode of interviewing.[30]

50  
51  
52  
53  
54 The microdata did not contain any personal information, such as names or  
55  
56 addresses, which would allow direct identification. In order to ensure confidentiality,  
57  
58 a set of anonymisation rules was applied.[31] Access to microdata is granted only for  
59  
60

1  
2  
3 scientific purposes; we were granted access by the UK Data Service  
4  
5 (www.ukdataservice.ac.uk).  
6  
7  
8  
9

### 10 **Data and variables**

11  
12 There are two questions in the EHIS that measure mobile difficulty: a) variable PL6,  
13  
14 “Difficulty in walking half a km on level ground without the use of any aid”, and b)  
15  
16 variable PL7, “Difficulty in walking up or down 12 steps”. These two variables were  
17  
18 merged into a new variable, called ‘mobility impairment’, with answers ‘without  
19  
20 difficulty’ (women that answered that they had no difficulty in performing either  
21  
22 tasks), and ‘with difficulty’ (women that replied that they had some difficulty in  
23  
24 performing or were unable to do at least one of the tasks).  
25  
26  
27

28  
29 Our dependent variable, “up to date with mammography”, was recoded and  
30  
31 was binary, that is, ‘Yes’ (included the answers “within the last 12 months”, “1 to less  
32  
33 than 2 years”, and “2 to less than 3 years”), and ‘No’ (“more than 3 years” and  
34  
35 “never”). This recoding was done according to the NHS guidelines on  
36  
37 mammography.[26] Previous research has also employed this variable, looking at  
38  
39 women being up to date with mammography.[10]  
40  
41

42  
43 In total, we had 9,995 observations for women that answered the question on  
44  
45 mammography. Since STATA, by default, performs listwise-deletion and displays  
46  
47 calculations that have non-missing values on all variables listed, our total sample size  
48  
49 was 9,491 observations (6,794 observations for women without mobility impairment,  
50  
51 and 2,697 for women with mobility impairment). Since only a very small percentage  
52  
53 of observations was deleted, we decided not to proceed to maximum likelihood or  
54  
55 multiple imputation.[32] The sample is representative of the target population (test  
56  
57 results available upon request).  
58  
59  
60

1  
2  
3 The control variables included the following: a) *age*: 20-49 / 50-69 / 70+  
4  
5 (while the target group is 50-69-year-old women, the survey showed that almost 30%  
6  
7 of women outside the target group have undertaken a mammogram); b) *civil status*:  
8  
9 never married / married / widowed / divorced; c) *region*: England / Wales / Scotland /  
10  
11 Northern Ireland; d) *urbanisation*: thinly-populated area / moderate-populated area /  
12  
13 densely-populated area; e) *education*: primary and lower secondary / upper secondary  
14  
15 / post-secondary and tertiary, short / tertiary; f) *income quintiles* (net monthly  
16  
17 equivalised household income): 1<sup>st</sup> quintile / 2<sup>nd</sup> quintile / 3<sup>rd</sup> quintile / 4<sup>th</sup> quintile / 5<sup>th</sup>  
18  
19 quintile; g) *employment*: unemployed / employed / inactive; h) *health self-*  
20  
21 *assessment*: bad (answers ‘bad’ and ‘very bad’) / fair (answer ‘fair’) / good (answers  
22  
23 ‘good’ and ‘very good’); and i) *help from neighbours* (how easy it is to get help from  
24  
25 neighbours in case of need): difficult / possible / easy.  
26  
27  
28  
29

30 All analyses were performed using STATA/MP version 14.2.  
31  
32  
33

### 34 **Patient and Public Involvement**

35  
36  
37 Patients were not directly involved in the design or conduct of this study. However,  
38  
39 the research question and outcome measures were informed by patients’ priorities,  
40  
41 and experiences, as these were communicated through patient and public involvement  
42  
43 in a previous study (the Challenges of Cancer and Disability Study, Tenovus  
44  
45 TIG2017-05).  
46  
47  
48  
49

### 50 **RESULTS**

51  
52  
53 Table 1 summarises the characteristics of the study sample.  
54  
55  
56

57 **Table 1:** Comparison between women with and without mobility impairment  
58  
59  
60

| Parameter                     | Women without mobility impairment (n=6,794) |       | Women with mobility impairment (n=2,697) |       | p value, chi-squared test |
|-------------------------------|---------------------------------------------|-------|------------------------------------------|-------|---------------------------|
|                               | n                                           | %     | n                                        | %     |                           |
| <b>Age groups</b>             |                                             |       |                                          |       |                           |
|                               | 20-49 (n=3,270)                             | 2,919 | 43.0                                     | 351   | 13.0                      |
|                               | 50-69 (n=3,971)                             | 2,839 | 42.8                                     | 1,132 | 42.0                      |
|                               | 70+ (n=2,250)                               | 1,036 | 15.3                                     | 1,214 | 45.1                      |
| <b>Civil status</b>           |                                             |       |                                          |       |                           |
|                               | Never married (n=1,515)                     | 1,259 | 18.5                                     | 256   | 9.5                       |
|                               | Married (n=5,386)                           | 4,097 | 60.3                                     | 1,289 | 47.8                      |
|                               | Widowed (n=1,324)                           | 604   | 8.9                                      | 720   | 26.7                      |
|                               | Divorced (n=1,266)                          | 834   | 12.3                                     | 432   | 16.0                      |
| <b>Region</b>                 |                                             |       |                                          |       |                           |
|                               | England (n=7,895)                           | 5,695 | 83.8                                     | 2,200 | 81.6                      |
|                               | Wales (n=421)                               | 269   | 4.0                                      | 152   | 5.6                       |
|                               | Scotland (n=822)                            | 596   | 8.8                                      | 226   | 8.4                       |
|                               | Northern Ireland (n=353)                    | 234   | 3.4                                      | 119   | 4.4                       |
| <b>Urbanisation</b>           |                                             |       |                                          |       |                           |
|                               | Thinly-populated area (n=1,322)             | 945   | 13.9                                     | 377   | 14.0                      |
|                               | Moderate-populated area (n=2,575)           | 1,842 | 27.1                                     | 733   | 27.2                      |
|                               | Densely-populated area (n=5,594)            | 4,007 | 59.0                                     | 1,587 | 58.8                      |
| <b>Education</b>              |                                             |       |                                          |       |                           |
|                               | Primary / lower secondary (n=3,040)         | 1,699 | 25.0                                     | 1,341 | 49.7                      |
|                               | Upper secondary (n=3,223)                   | 2,394 | 35.2                                     | 829   | 30.7                      |
|                               | Post secondary / tertiary, short (n=1,495)  | 1,156 | 17.0                                     | 339   | 12.6                      |
|                               | Tertiary (n=1,733)                          | 1,545 | 22.7                                     | 188   | 7.0                       |
| <b>Income quintiles</b>       |                                             |       |                                          |       |                           |
|                               | 1 <sup>st</sup> quintile (n=1,962)          | 1,108 | 16.3                                     | 854   | 31.7                      |
|                               | 2 <sup>nd</sup> quintile (n=2,008)          | 1,336 | 19.7                                     | 672   | 24.9                      |
|                               | 3 <sup>rd</sup> quintile (n=1,932)          | 1,352 | 19.9                                     | 580   | 21.5                      |
|                               | 4 <sup>th</sup> quintile (n=1,852)          | 1,493 | 22.0                                     | 359   | 13.3                      |
|                               | 5 <sup>th</sup> quintile (n=1,737)          | 1,505 | 22.2                                     | 232   | 8.6                       |
| <b>Employment</b>             |                                             |       |                                          |       |                           |
|                               | Unemployed (n=360)                          | 271   | 4.0                                      | 89    | 3.3                       |
|                               | Employed (n=4,304)                          | 3,836 | 56.5                                     | 468   | 17.4                      |
|                               | Inactive (n=4,827)                          | 2,687 | 39.6                                     | 2,140 | 79.4                      |
| <b>Health self-assessment</b> |                                             |       |                                          |       |                           |

|                             |                     |       |      |       |      |                   |
|-----------------------------|---------------------|-------|------|-------|------|-------------------|
|                             | Bad (n=797)         | 90    | 1.3  | 707   | 26.2 | <i>p</i> < 0.0001 |
|                             | Fair (n=1,896)      | 774   | 11.4 | 1,122 | 41.6 |                   |
|                             | Good (n=6,798)      | 5,930 | 87.3 | 868   | 32.2 |                   |
| <b>Help from neighbours</b> |                     |       |      |       |      |                   |
|                             | Difficult (n=1,312) | 805   | 11.9 | 507   | 18.8 | <i>p</i> < 0.0001 |
|                             | Possible (n=1,923)  | 1,426 | 21.0 | 497   | 18.4 |                   |
|                             | Easy (n=6,256)      | 4,563 | 67.2 | 1,693 | 62.8 |                   |

Note: For more information on the variables, please see the EHIS Wave 2 methodological manual.[28]

Some of the points presented in Table 1 are of particular interest. Firstly, concerning education, about half of women with mobility impairment had only primary or lower secondary education, as opposed to only a quarter of women without any mobility impairment; a much higher percentage of women from the latter group had also attended tertiary education. Secondly, more women with mobility impairment (32%) belonged to the first income quintile than women with no mobility impairment (16%). Less than 9% of women from the former group belonged to the richest segment; this percentage was more than 22% for women without any mobility impairment. Thirdly, the percentage of women with mobility impairment that were inactive was double (i.e. almost 80%) than that of women without any mobility problems. All these points underline the structural disadvantage faced by women with mobility impairment in the UK: lower education and lower income, coupled with a much higher likelihood of being inactive employment-wise.

Figure 1 shows the percentage of women (total sample, including both women with and without mobility impairment) that have undertaken mammography, by age group.

[Please place Figure 1 here]

1  
2  
3 As it can be seen in Figure 1, 71% of all women who undertook mammography were  
4 in the target group, i.e. 50-69 years of age. Almost 30% of all women that underwent  
5 the test were outside the target group. In certain parts of England, women younger  
6 than 50 and older than 70 years are invited for mammograms, [33], while a systematic  
7 review has shown that women out of the target group also undergo  
8 mammography.[18]  
9

10  
11  
12  
13  
14  
15  
16  
17 Figure 2 shows women with and without mobility impairments that have  
18 undertaken mammography, by age group.  
19

20  
21  
22 [Please place Figure 2 here]  
23

24  
25  
26 Figure 2 shows that almost 30% of women with mobility impairment that undertook  
27 mammography were 70+ years-old, i.e. outside the target group; this percentage is  
28 less than half of that for women without mobility impairment.  
29

30  
31  
32  
33 We performed logistic regressions to see whether there was any difference in  
34 utilisation rates of mammography between women with and without mobility  
35 impairment in the UK, and to investigate the factors associated with such rates. The  
36 first logistic regression – which included all the variables of Table 1 – showed that  
37 women with mobility impairment had 1.3 times lower odds of undertaking a  
38 mammogram than women without mobility problems (OR: .80, 95% CI = .70-.92,  
39 p=.002) (full results not presented here but available upon request).  
40  
41  
42  
43  
44  
45  
46  
47  
48

49  
50 Next, Table 2 presents possible factors associated with having a mammogram  
51 for women with mobility impairment in the UK. Model (1) presents age-adjusted odds  
52 ratios. Model (2) incorporates other demographic and socioeconomic variables, while  
53 Model (3) presents the fully-adjusted odds ratios (includes all variables of Table 1).  
54  
55  
56  
57  
58  
59  
60



**Table 2:** Factors associated with utilisation rates of mammography by women with mobility impairment in the UK

| Variables                                            | Model (1) |            | Model (2) |             | Model (3) |            |
|------------------------------------------------------|-----------|------------|-----------|-------------|-----------|------------|
|                                                      | OR        | 95% CI     | OR        | 95% CI      | OR        | 95% CI     |
| <b>Age groups (20-49 as reference)</b>               |           |            |           |             |           |            |
| 50-69                                                | 11.57***  | 8.67-15.44 | 11.99***  | 8.78- 16.38 | 12.12***  | 8.85-16.61 |
| 70+                                                  | 1.69***   | 1.27-2.25  | 1.96***   | 1.39-2.75   | 1.94***   | 1.37- 2.74 |
| <b>Civil status (never married as reference)</b>     |           |            |           |             |           |            |
| Married                                              |           |            | 2.05***   | 1.48-2.85   | 2.07***   | 1.49-2.88  |
| Widowed                                              |           |            | .934      | .65-1.34    | .95       | .66-1.37   |
| Divorced                                             |           |            | 1.44      | 1.00-2.08   | 1.46*     | 1.01-2.12  |
| <b>Regions (England as reference)</b>                |           |            |           |             |           |            |
| Wales                                                |           |            | 1.00      | .68-1.48    | 1.01      | .68-1.49   |
| Scotland                                             |           |            | 1.48*     | 1.06-2.05   | 1.51*     | 1.08-2.10  |
| Northern Ireland                                     |           |            | .91       | .58-1.41    | .90       | .57-1.40   |
| <b>Urbanisation (thinly-populated as reference)</b>  |           |            |           |             |           |            |
| Intermediate-populated area                          |           |            | .89       | .67-1.19    | .90       | .67-1.20   |
| Densely-populated area                               |           |            | .77       | .59-1.01    | .77       | .59-1.01   |
| <b>Education (primary/lower secondary as ref.)</b>   |           |            |           |             |           |            |
| Upper secondary                                      |           |            | 1.33**    | 1.08-1.64   | 1.36**    | 1.10-1.67  |
| Post secondary and tertiary, short                   |           |            | 1.20      | .91-1.58    | 1.21      | .91-1.60   |
| Tertiary                                             |           |            | .88       | .61-1.28    | .88       | .60-1.28   |
| <b>Employment (unemployed as reference)</b>          |           |            |           |             |           |            |
| Employed                                             |           |            | .94       | .54-1.66    | .93       | .53-1.63   |
| Inactive                                             |           |            | 1.29      | .76-2.20    | 1.30      | .76-2.22   |
| <b>Income (1<sup>st</sup> quintile as reference)</b> |           |            |           |             |           |            |
| 2 <sup>nd</sup> quintile                             |           |            | 1.11      | .88-1.40    | 1.09      | .86-1.38   |
| 3 <sup>rd</sup> quintile                             |           |            | 1.32*     | 1.03-1.69   | 1.29**    | 1.01-1.66  |
| 4 <sup>th</sup> quintile                             |           |            | 1.18      | .87-1.59    | 1.18      | .87-1.60   |
| 5 <sup>th</sup> quintile                             |           |            | 1.46*     | 1.01-2.11   | 1.49**    | 1.02-2.15  |
| <b>Health self-assessment (bad as reference)</b>     |           |            |           |             |           |            |
| Fair                                                 |           |            |           |             | 1.14      | .91-1.42   |
| Good                                                 |           |            |           |             | 1.11      | .87-1.42   |
| <b>Support from neighbours (difficult as ref.)</b>   |           |            |           |             |           |            |
| Possible                                             |           |            |           |             | 1.08      | .81-1.45   |
| Easy                                                 |           |            |           |             | 1.07      | .85-1.35   |
| <b>Observations</b>                                  | 2,790     |            | 2,738     |             | 2,697     |            |
| <b>Pseudo R<sup>2</sup></b>                          | 0.1636    |            | 0.1908    |             | 0.1923    |            |

|                                |          |          |          |
|--------------------------------|----------|----------|----------|
| <b>Chi<sup>2</sup> (21)</b>    | 631.29   | 722.80   | 718.04   |
| <b>Prob&gt;Chi<sup>2</sup></b> | 0.0000   | 0.0000   | 0.0000   |
| <b>McFadden R<sup>2</sup></b>  | 0.162    | 0.179    | 0.180    |
| <b>Deviance</b>                | 3228.188 | 3066.311 | 3015.368 |
| <b>AIC</b>                     | 3234.188 | 3106.311 | 3063.368 |
| <b>BIC</b>                     | 3251.989 | 3224.610 | 3204.965 |

\*  $p < 0.05$ , \*\*  $p < 0.01$ , \*\*\*  $p < 0.001$

Due to a higher Mac Fadden R<sup>2</sup>, and lower deviance, and AIC and BIC values, Model (3) provided a better fit than the previous two models. There was no collinearity affecting the results, with mean variance inflation factor (VIF) of 2.21.

As it can be seen in Table 2, the target group for having a mammogram (i.e. the 50-69 group) was the one with the highest odds of undertaking it: women in this age subgroup had 12 times higher odds of having this screening than women in the 20-49 subgroup. Regarding civil status, married women had more than twice the odds of having a mammogram than women that had never been married; divorced women had 1.5 times higher odds. Women with mobility impairment in Scotland had 1.5 times higher odds of having the mammogram than women in England. Women with upper secondary education had 1.4 times higher odds to have a mammogram than women with primary or lower secondary education. Also, women from higher income quintiles (third and fifth quintiles) had higher odds of undertaking the mammogram, with the women in the fifth quintile having 1.5 times higher odds than women from the first quintile.

## DISCUSSION

In this study, we investigated whether women with mobility impairment in the UK were less likely to be up to date with mammography compared to women with no mobility impairment, and explored some of the factors associated with lower

1  
2  
3 utilisation. The results showed a statistically significant difference between women  
4  
5 with and without mobility impairment, with women with mobility impairment having  
6  
7 1.3 times lower odds of undertaking a mammogram than women without mobility  
8  
9 impairment. Furthermore, the results showed a positive association between married  
10  
11 civil status, high income, educational attainment, and living in Scotland, and being up  
12  
13 to date with mammography.  
14  
15

16  
17 One of the strengths of the study is that it is based on data from a nationally-  
18  
19 representative sample. It also adds to the body of literature by examining the  
20  
21 association of several factors with mammography utilisation for women with mobility  
22  
23 impairment, an issue that has been generally little explored, particularly in the UK.  
24  
25

26  
27 One of the limitations of the study is that while we established associations  
28  
29 between various factors and utilisation of mammography by women with mobility  
30  
31 impairment, we cannot infer causality due to the cross-sectional nature of the data.  
32  
33 Another limitation of the study is that there is no information in the EHIS on the  
34  
35 reasons that influence utilisation of mammography. Furthermore, the EHIS relies on  
36  
37 self-reporting information, which leaves the instrument open to response bias;  
38  
39 however, there is no relevant information on this aspect. Another limitation of the  
40  
41 study is the way mobility impairment was defined, which potentially included women  
42  
43 with only short-term impairment, together with women with longer-term impairment;  
44  
45 this might have had an impact on external validity.  
46  
47  
48

49  
50 The findings showed that women with mobility impairment had 1.3 lower  
51  
52 odds of being up to date with mammography. This is consistent with previous  
53  
54 research that shows that in the UK, there are long-standing inequalities between  
55  
56 people's cancer experiences.[34] This finding is also consistent with research findings  
57  
58 from a study in England. [25] Bone et al. performed an analysis of data from the  
59  
60

1  
2  
3 National Cancer Patient Experience Survey.[35] They analysed data from 71,793  
4  
5 cancer patients and found evidence that cancer patients with long-standing conditions  
6  
7 in England, including people with physical conditions and disabilities, reported poorer  
8  
9 care. These inequalities persisted even when controlling for other factors. Further to  
10  
11 this, people with pre-existing disability diagnosed with cancer report low satisfaction  
12  
13 and use of services.[7-8, 36] As Liu and Clark have shown, quality of the experience  
14  
15 matters;[37] previous negative experiences with mammography might deter women  
16  
17 with physical impairments from undertaking the test in the future.  
18  
19

20  
21 The findings also showed that married women had higher odds of having a  
22  
23 mammogram than women that had never been married. This result is in accordance  
24  
25 with evidence demonstrating the protective role of married civil status.[23,38] Indeed,  
26  
27 married people tend to have more fixed residence, regular doctors, and fixed  
28  
29 healthcare places, and therefore are more likely to be informed and accept preventive  
30  
31 health services than unmarried people.[38] They have also a stronger social network  
32  
33 (for example, family members, relatives, and friends) that can offer them more  
34  
35 emotional and practical support (for instance, transportation) to attend such  
36  
37 screenings, as well as help them adopt healthier behaviours.  
38  
39

40  
41 Our study also revealed that there are differences in the utilisation rates of  
42  
43 mammography between women living in different regions in the United Kingdom,  
44  
45 with women with mobility impairment living in Scotland having higher odds of  
46  
47 undertaking the test than women in England. The reason behind this might be the  
48  
49 usage of mobile screening units in Scotland, which appears to enable access to  
50  
51 mammography for underserved populations.[39]  
52  
53

54  
55 Furthermore, our study showed that women with mobility impairments with  
56  
57 higher education had higher odds of having a mammogram than women with primary  
58  
59  
60

1  
2  
3 or lower secondary education. Women with mobility impairment that belonged to  
4  
5 higher income quintiles had also higher odds of having a mammogram than women  
6  
7 belonging to the first quintile. This result agrees with previous research that found  
8  
9 that disabled women with higher education and an overall higher socioeconomic  
10  
11 status were more likely to undertake preventive exams.[40-41] Educational attainment  
12  
13 beyond upper secondary did not seem to have any further positive effect on the uptake  
14  
15 of mammography.  
16  
17

18  
19 These inequalities in the experiences of patients with cancer in the UK conflict  
20  
21 with several of the recommendations of recent strategic documents, including  
22  
23 ‘Achieving world-class cancer outcomes: a Strategy for England 2015-2020’ and the  
24  
25 Cancer Delivery Plan for Wales.[42,43] Both documents call for access to equitable  
26  
27 care, achieving the best experience, and promoting delivery of cancer care responsive  
28  
29 to individual needs.  
30  
31

32  
33 Overall, taking into account the global demographic, epidemiological, and  
34  
35 socioeconomic changes – including ageing, urbanisation, reduction in morbidity and  
36  
37 mortality rates, and increase in chronic diseases – it is essential that preventive health  
38  
39 services are better promoted and reach all people, especially disadvantaged groups,  
40  
41 such as people with disabilities, women, and the poor. The WHO position paper on  
42  
43 mammography states that:  
44  
45

46  
47 “Population-based screening programmes identify and individually invite each  
48  
49 person in the eligible population to attend each round of screening so that each  
50  
51 person in the eligible population has an equal chance of benefiting from  
52  
53 screening.” (p.23).[12]  
54  
55

56 This statement, however, overlooks the fact that not everyone has an equal chance of  
57  
58 benefitting from screening; people with mobility impairment may, for example, face  
59  
60

1  
2  
3 transportation barriers, which could stop them from accessing screening services,  
4  
5 despite their availability. Women with mobility impairment, and disabilities in  
6  
7 general, are further disadvantaged, as they also face structural disadvantage – in the  
8  
9 form of lower education, lower income, and greater poverty – than men, as shown in  
10  
11 this study and supported by a body of existing research.[44-45] In order to enhance  
12  
13 the utilisation of mammography (and possibly the use of other preventive services), it  
14  
15 is important to acknowledge the barriers that stop women from using the service and  
16  
17 adopt measures that would lead to a more equitable utilisation. The wide adoption of  
18  
19 mobile screening units might be a way to improve access for this population. This  
20  
21 needs to be complemented by increased disability-awareness for healthcare  
22  
23 professionals, making them sensitive to addressing impairment-specific needs in order  
24  
25 to achieve inclusive services for all.  
26  
27  
28  
29  
30  
31  
32

### 33 **Acknowledgments**

34  
35 We wish to thank Gill Tyrer for her contribution as a patient and public representative  
36  
37 in a previous project (Tenovus, TIG2017-05), which offered the stimulus to explore  
38  
39 barriers to cancer screening for this population.  
40  
41  
42  
43  
44

### 45 **Contributors**

46  
47 DS and ESR jointly conceived the final research question and aims and objectives,  
48  
49 reviewed the literature, produced the analysis plan and carried out the analysis, and  
50  
51 drafted the manuscript.  
52  
53

### 54 **Funding**

55  
56 None declared.  
57

### 58 **Competing interests**

1  
2  
3 None declared.  
4

5 **Ethics approval**

6  
7  
8 None required.  
9

10 **Data sharing statement**

11  
12 Technical appendix and dataset available from the UK Data Service.  
13

14 <https://discover.ukdataservice.ac.uk/catalogue/?sn=7881>  
15  
16  
17  
18  
19  
20  
21  
22  
23  
24  
25  
26  
27  
28  
29  
30  
31  
32  
33  
34  
35  
36  
37  
38  
39  
40  
41  
42  
43  
44  
45  
46  
47  
48  
49  
50  
51  
52  
53  
54  
55  
56  
57  
58  
59  
60

## References

- 1 Iezzoni LI, McCarthy EP, Davis RB, et al. Mobility impairments and use of screening and preventive services. *Am J Public Health* 2000;90(6):955.
- 2 Kroll T, Jones GC, Kehn M, et al. Barriers and strategies affecting the utilisation of primary preventive services for people with physical disabilities: a qualitative inquiry. *Health Soc Care Community* 2006;14(4):284-93.
- 3 Sakellariou D, Rotarou ES. Access to healthcare for men and women with disabilities in the UK: secondary analysis of cross-sectional data. *BMJ Open* 2017;7(8):e016614. doi: 10.1136/bmjopen-2017-016614. (accessed 23 May 2018).
- 4 Popplewell NT, Rechel BP, Abel GA. How do adults with physical disability experience primary care? A nationwide cross-sectional survey of access among patients in England. *BMJ Open* 2014;4:e004714. doi: <http://bmjopen.bmj.com/content/4/8/e004714> (accessed 23 May 2018).
- 5 Gibson J, O'Connor R. Access to health care for disabled people: a systematic review. *Social Care and Neurodisability* 2010;1:21–31.
- 6 Llewellyn G, Balandin S, Poulos A, et al. Disability and mammography screening: intangible barriers to participation. *Disabil Rehabil* 2011;33(19-20):1755-1767.
- 7 Angus J, Seto L, Barry N, et al. Access to cancer screening for women with mobility disabilities. *J of Cancer Educ* 2012;27(1):75-82.
- 8 Peters K, Cotton A. Barriers to breast cancer screening in Australia: Experiences of women with physical disabilities. *J Clin Nurs* 2015;24(3-4):563-572.
- 9 Devaney J, Seto L, Barry N, et al. Navigating healthcare: gateways to cancer screening. *Disabil Soc* 2009;24(9):739-751.



- 1  
2  
3 10 Horner-Johnson W, Dobbertin K, Andresen EM, et al. Breast and cervical cancer  
4 screening disparities associated with disability severity. *Womens Health Issues*  
5 2014;24(1):e147-53.  
6  
7  
8  
9  
10 11 Iezzoni LI, McCarthy EP, Davis RB, et al. Use of screening and preventive  
11 services among women with disabilities. *Am J Med Qual* 2001;16(4):135-44.  
12  
13  
14 12 World Health Organization. WHO Position Paper On Mammography Screening.  
15 World Health Organization; 2014.  
16  
17  
18  
19 13 Weedon-Fekjær H, Romundstad PR, Vatten LJ. Modern mammography screening  
20 and breast cancer mortality: population study. *BMJ* 2014;348:g3701.  
21  
22  
23  
24 14 Bleyer A, Welch HG. Effect of three decades of screening mammography on  
25 breast-cancer incidence. *N Engl J Med* 2012;367(21):1998-2005.  
26  
27  
28  
29 15 Broeders M, Moss S, Nyström L, et al. The impact of mammographic screening on  
30 breast cancer mortality in Europe: a review of observational studies. *J Med Screen*  
31 2012;19(1\_suppl):14-25.  
32  
33  
34  
35 16 Jørgensen KJ, Zahl PH, Gøtzsche PC. Breast cancer mortality in organised  
36 mammography screening in Denmark: comparative study. *BMJ* 2010;340:c1241.  
37  
38  
39  
40 17 Rafia R, Brennan A, Madan J, et al. Modeling the cost-effectiveness of alternative  
41 upper age limits for breast cancer screening in England and Wales. *Value Health*  
42 2016;19(4):404-12.  
43  
44  
45  
46 18 Gøtzsche PC, Jørgensen KJ. Screening for breast cancer with mammography.  
47 Cochrane Database Syst Rev;2013;6: CD001877.  
48  
49  
50  
51 19 Kerlikowske K, Grady D, Rubin SM, et al. Efficacy of screening mammography: a  
52 meta-analysis. *JAMA* 1995;273(2):149-54.  
53  
54  
55  
56 20 National Health Service. Breast Cancer Screening.  
57  
58 <https://www.nhs.uk/conditions/breast-cancer-screening/> (accessed 29 May 2018).  
59  
60

- 1  
2  
3 21 Floud S, Barnes I, Verfürden M, et al. Disability and participation in breast and  
4  
5 bowel cancer screening in England: a large prospective study. *Br J Cancer* 2017  
6  
7 Nov;117(11):1711.  
8  
9  
10 22 Todd A, Stuijbergen A. Breast cancer screening barriers and disability. *Rehabil*  
11  
12 *Nurs* 2012;37(2):74-9.  
13  
14 23 Iezzoni LI, Kilbridge K, Park ER. Physical access barriers to care for diagnosis  
15  
16 and treatment of breast cancer among women with mobility impairments. *Oncol Nurs*  
17  
18 *Forum* 2010;37:711.  
19  
20 24 Iezzoni LI, Park ER, Kilbridge KL. Implications of mobility impairment on the  
21  
22 diagnosis and treatment of breast cancer. *J Womens Health* 2011;20(1):45-52.  
23  
24 25 Sakellariou D, Rotarou ES. Utilisation of cancer screening services by disabled  
25  
26 women in Chile. *PloS One* 2017;12(5):e0176270.  
27  
28  
29  
30 <https://doi.org/10.1371/journal.pone.0176270> (accessed 23 May 2018).  
31  
32 26 Barr JK, Giannotti TE, Hoof TJ, et al. Understanding barriers to participation in  
33  
34 mammography by women with disabilities. *Am J Health Promot* 2008;22(6):381-5.  
35  
36 27 Eurostat. European Health Interview Survey (EHIS). Description of the dataset.  
37  
38 No date. <http://ec.europa.eu/eurostat/web/microdata/european-health-interview-survey>  
39  
40 (accessed 17 May 2018).  
41  
42 28 Eurostat. European Health Interview Survey (EHIS wave 2). Methodological  
43  
44 manual. Eurostat Methodologies and Working Papers. Luxembourg: Publications  
45  
46 Office of the European Union. 2013.  
47  
48  
49  
50 [https://ec.europa.eu/eurostat/documents/3859598/5926729/KS-RA-13-018-](https://ec.europa.eu/eurostat/documents/3859598/5926729/KS-RA-13-018-EN.PDF/26c7ea80-01d8-420e-bdc6-e9d5f6578e7c)  
51  
52 [EN.PDF/26c7ea80-01d8-420e-bdc6-e9d5f6578e7c](https://ec.europa.eu/eurostat/documents/3859598/5926729/KS-RA-13-018-EN.PDF/26c7ea80-01d8-420e-bdc6-e9d5f6578e7c). (accessed 23 November 2018).  
53  
54  
55  
56  
57  
58  
59  
60

1  
2  
3 29 Office for National Statistics. Health indicators for the United Kingdom and its  
4 constituent countries based on the 2013 to 2014 European Health Interview Survey,  
5 (Wave 2) 2015. <http://webarchive.nationalarchives.gov.uk/> (accessed 23 May 2018).  
6  
7

8  
9  
10 30 Office for National Statistics, Northern Ireland Statistics and Research Agency.  
11 *European Health Interview Survey: United Kingdom Data, Wave 2, 2013-2014*. UK  
12 Data Service SN: 7881 2016 <https://discover.ukdataservice.ac.uk/catalogue/?sn=7881>  
13 (accessed 17 May 2018).  
14  
15  
16  
17

18  
19 31 Eurostat. European Health Interview Survey (EHIS). Reference Metadata in Euro  
20 SDMX Metadata Structure (ESMS). 2016.  
21  
22 [http://ec.europa.eu/eurostat/cache/metadata/en/hlth\\_det\\_esms.htm#conf14728059019](http://ec.europa.eu/eurostat/cache/metadata/en/hlth_det_esms.htm#conf14728059019)  
23  
24  
25  
26 [15](#) (accessed 20 May 2018).  
27

28  
29 32 Allison P. Listwise deletion: It's NOT evil. Statistical Horizons.  
30  
31 <http://statisticalhorizons.com/listwise-deletion-its-not-evil> (accessed 30 May 2018).  
32

33 33 Cancer Research UK. Breast screening. 2017.  
34  
35 [https://www.cancerresearchuk.org/about-cancer/breast-cancer/screening/breast-](https://www.cancerresearchuk.org/about-cancer/breast-cancer/screening/breast-screening)  
36  
37  
38 [screening](#) (accessed 24 November 2018)  
39

40 34 All Party Parliamentary Group on Cancer. Report of the All Party Parliamentary  
41 Group on Cancer's Inquiry into Inequalities in Cancer. Cardiff: Welsh Government  
42 2009.  
43  
44  
45  
46 [http://www.macmillan.org.uk/Documents/Campaigns/InquiryintoInequalitiesReport.p](http://www.macmillan.org.uk/Documents/Campaigns/InquiryintoInequalitiesReport.pdf)  
47  
48  
49 [df](#) (accessed 30 May 2018).  
50

51 35 Bone A, Mc Grath-Lone L, Day S, et al. Inequalities in the care  
52 experiences of patients with cancer: Analysis of data from the National Cancer Patient  
53 Experience Survey 2011-2012. *BMJ Open* 2014;4:e004567. doi: 10.1136/bmjopen-  
54 2013-004567 (accessed 30 May 2018).  
55  
56  
57  
58  
59  
60

- 1  
2  
3 36 Merten J W. Barriers to cancer screening for people with disabilities: A literature  
4 review. *Disabil Health J* 2015;8(1):9-16.  
5  
6  
7  
8 37 Liu SY, Clark MA. Breast and cervical cancer screening practices among disabled  
9 women aged 40–75: does quality of the experience matter? *J Womens Health*  
10 2008;7(8):1321-9.  
11  
12  
13  
14 38 Yen SM, Kung PT, Tsai WC. Factors associated with free adult preventive health  
15 care utilization among physically disabled people in Taiwan: nationwide population-  
16 based study. *BMC Health Serv Res* 2014;4(1):610.  
17  
18  
19  
20 39 Leung J, Macleod C, McLaughlin D, Woods LM, et al. Screening mammography  
21 uptake within Australia and Scotland in rural and urban populations. *Prev Med Rep*  
22 2015;2:559-62.  
23  
24  
25  
26 40 Hewitt M, Devesa SS, Breen N. Cervical cancer screening among US women:  
27 analyses of the 2000 National Health Interview Survey. *Prev Med* 2004;39(2):270-8.  
28  
29  
30  
31 41 Rodríguez MA, Ward LM, Pérez-Stable EJ. Breast and cervical cancer screening:  
32 impact of health insurance status, ethnicity, and nativity of Latinas. *Ann Fam Med*  
33 2005;3(3):235-41.  
34  
35  
36  
37 42 Independent Cancer Taskforce. Achieving World-Class Cancer Outcomes: a  
38 Strategy for England 2015-2020. 2016. [http://www.cancerresearchuk.org/about-](http://www.cancerresearchuk.org/about-us/cancer-strategy-in-england)  
39 [us/cancer-strategy-in-england](http://www.cancerresearchuk.org/about-us/cancer-strategy-in-england)  
40 (accessed 30 May 2018).  
41  
42  
43  
44 43. Welsh Government. Together for Health- Cancer Delivery Plan; A Delivery Plan  
45 up to 2016 for NHS Wales and its Partners. Cardiff: Welsh Government 2012.  
46  
47  
48  
49 44 Yeo R, Moore K. Including disabled people in poverty reduction work: “Nothing  
50 about us, without us”. *World Dev* 2003;31(3):571-90.  
51  
52  
53  
54  
55  
56  
57  
58  
59  
60

1  
2  
3  
4  
5  
6  
7  
8  
9  
10  
11  
12  
13  
14  
15  
16  
17  
18  
19  
20  
21  
22  
23  
24  
25  
26  
27  
28  
29  
30  
31  
32  
33  
34  
35  
36  
37  
38  
39  
40  
41  
42  
43  
44  
45  
46  
47  
48  
49  
50  
51  
52  
53  
54  
55  
56  
57  
58  
59  
60

45 Pinto PC. Women, disability, and the right to health. *In* Gender and Women's  
Studies: Critical Terrain. M Hobbs, C Rice, eds. Toronto: Women's Press 2018;465-  
479.

For peer review only

1  
2  
3 **Figure legends**  
4  
5  
6  
7

8 **Figure 1:** Women having undertaken mammography, by age group (%)  
9

10  
11  
12 Note: 4,433 women in total.  
13  
14  
15

16  
17 **Figure 2:** Women with and without mobility impairment having undertaken  
18 mammography, by age group (%)  
19  
20

21  
22  
23 Note 1: 3,145 women without mobility impairment and 1,288 women with mobility  
24 impairment.  
25  
26

27 Note 2: Differences are statistically significant.  
28  
29  
30  
31  
32  
33  
34  
35  
36  
37  
38  
39  
40  
41  
42  
43  
44  
45  
46  
47  
48  
49  
50  
51  
52  
53  
54  
55  
56  
57  
58  
59  
60

1  
2  
3  
4  
5  
6  
7  
8  
9  
10  
11  
12  
13  
14  
15  
16  
17  
18  
19  
20  
21  
22  
23  
24  
25  
26  
27  
28  
29  
30  
31  
32  
33  
34  
35  
36  
37  
38  
39  
40  
41  
42  
43  
44  
45  
46  
47  
48  
49  
50  
51  
52  
53  
54  
55  
56  
57  
58  
59  
60

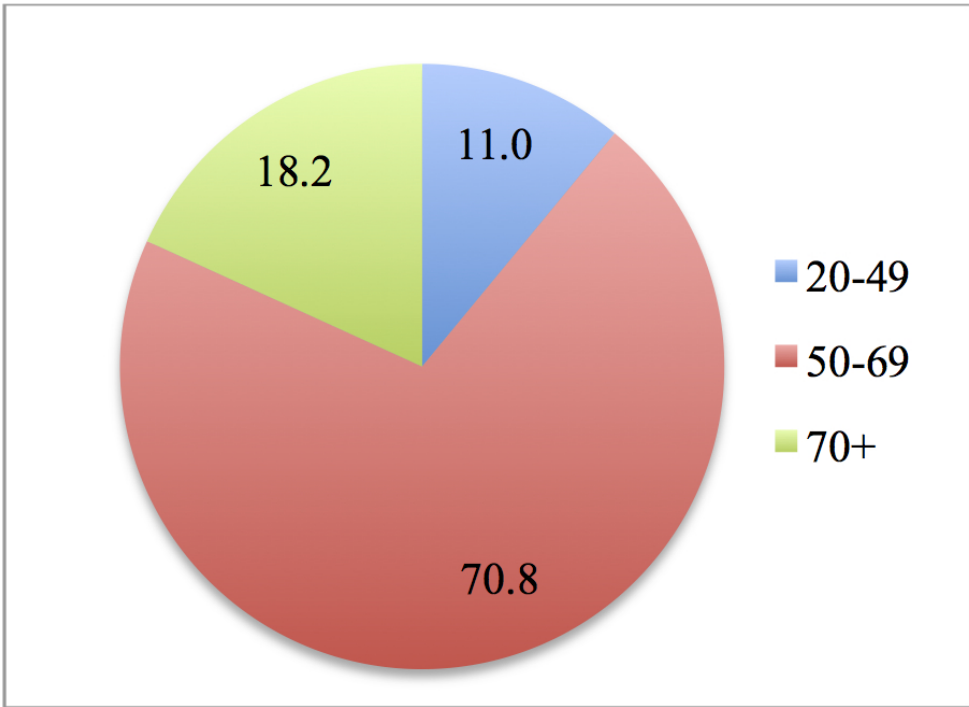

Women having undertaken mammography, by age group (%)

197x144mm (120 x 120 DPI)

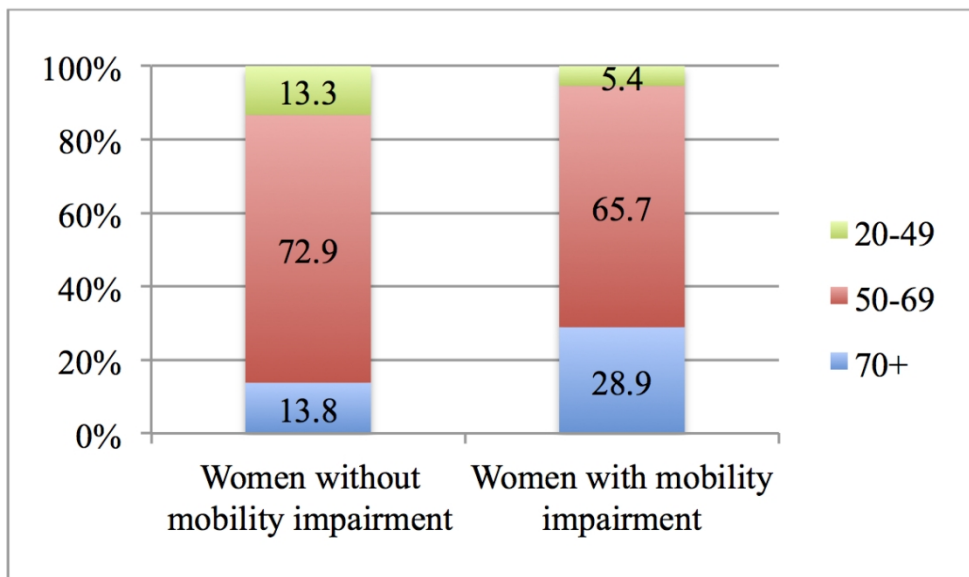

Women with and without mobility impairment having undertaken mammography, by age group (%)

255x151mm (120 x 120 DPI)



STROBE Statement—Checklist of items that should be included in reports of *cross-sectional studies*

|                          | Item No          | Recommendation                                                                                                                                                                                                 |
|--------------------------|------------------|----------------------------------------------------------------------------------------------------------------------------------------------------------------------------------------------------------------|
| Title and abstract       | X 1              | X p.1 (a) Indicate the study's design with a commonly used term in the title or the abstract                                                                                                                   |
|                          |                  | X p.2 (b) Provide in the abstract an informative and balanced summary of what was done and what was found                                                                                                      |
| <b>Introduction</b>      |                  |                                                                                                                                                                                                                |
| Background/rationale     | X p.4-5 2        | Explain the scientific background and rationale for the investigation being reported                                                                                                                           |
| Objectives               | X p.6 3          | State specific objectives, including any prespecified hypotheses                                                                                                                                               |
| <b>Methods</b>           |                  |                                                                                                                                                                                                                |
| Study design             | X p.2, p.6 4     | Present key elements of study design early in the paper                                                                                                                                                        |
| Setting                  | X p.6-7 5        | Describe the setting, locations, and relevant dates, including periods of recruitment, exposure, follow-up, and data collection                                                                                |
| Participants             | X p. 7-8 6       | (a) Give the eligibility criteria, and the sources and methods of selection of participants                                                                                                                    |
| Variables                | X p. 8-9 7       | Clearly define all outcomes, exposures, predictors, potential confounders, and effect modifiers. Give diagnostic criteria, if applicable                                                                       |
| Data sources/measurement | X p. 8-9 8*      | For each variable of interest, give sources of data and details of methods of assessment (measurement). Describe comparability of assessment methods if there is more than one group                           |
| Bias                     | X p. 14 9        | Describe any efforts to address potential sources of bias                                                                                                                                                      |
| Study size               | X p. 8-9 10      | Explain how the study size was arrived at                                                                                                                                                                      |
| Quantitative variables   | X p. 8-9 11      | Explain how quantitative variables were handled in the analyses. If applicable, describe which groupings were chosen and why                                                                                   |
| Statistical methods      | X 12             | X p. 6-8 (a) Describe all statistical methods, including those used to control for confounding                                                                                                                 |
|                          |                  | (b) Describe any methods used to examine subgroups and interactions                                                                                                                                            |
|                          |                  | X p.8-9 (c) Explain how missing data were addressed                                                                                                                                                            |
|                          |                  | (d) If applicable, describe analytical methods taking account of sampling strategy                                                                                                                             |
|                          |                  | (e) Describe any sensitivity analyses                                                                                                                                                                          |
| <b>Results</b>           |                  |                                                                                                                                                                                                                |
| Participants             | X 13*            | X p. 8 (a) Report numbers of individuals at each stage of study—eg numbers potentially eligible, examined for eligibility, confirmed eligible, included in the study, completing follow-up, and analysed       |
|                          |                  | (b) Give reasons for non-participation at each stage                                                                                                                                                           |
|                          |                  | (c) Consider use of a flow diagram                                                                                                                                                                             |
| Descriptive data         | X 14*            | X p.9-10 (a) Give characteristics of study participants (eg demographic, clinical, social) and information on exposures and potential confounders                                                              |
|                          |                  | (b) Indicate number of participants with missing data for each variable of interest                                                                                                                            |
| Outcome data             | X p. 8 15*       | Report numbers of outcome events or summary measures                                                                                                                                                           |
| Main results             | X p.12, p. 13 16 | X (a) Give unadjusted estimates and, if applicable, confounder-adjusted estimates and their precision (eg, 95% confidence interval). Make clear which confounders were adjusted for and why they were included |

|                          |                         |                                                                                                                                                                            |
|--------------------------|-------------------------|----------------------------------------------------------------------------------------------------------------------------------------------------------------------------|
|                          |                         | <b>X p.9</b> (b) Report category boundaries when continuous variables were categorized                                                                                     |
|                          |                         | (c) If relevant, consider translating estimates of relative risk into absolute risk for a meaningful time period                                                           |
| Other analyses           | 17                      | Report other analyses done—eg analyses of subgroups and interactions, and sensitivity analyses                                                                             |
| <b>Discussion</b>        |                         |                                                                                                                                                                            |
| Key results              | <b>X p.14</b><br>18     | Summarise key results with reference to study objectives                                                                                                                   |
| Limitations              | <b>X p.14</b><br>19     | Discuss limitations of the study, taking into account sources of potential bias or imprecision. Discuss both direction and magnitude of any potential bias                 |
| Interpretation           | <b>X p. 16-17</b><br>20 | Give a cautious overall interpretation of results considering objectives, limitations, multiplicity of analyses, results from similar studies, and other relevant evidence |
| Generalisability         | <b>X p.14</b><br>21     | Discuss the generalisability (external validity) of the study results                                                                                                      |
| <b>Other information</b> |                         |                                                                                                                                                                            |
| Funding                  | <b>X p.17</b><br>22     | Give the source of funding and the role of the funders for the present study and, if applicable, for the original study on which the present article is based              |

\*Give information separately for exposed and unexposed groups.

**Note:** An Explanation and Elaboration article discusses each checklist item and gives methodological background and published examples of transparent reporting. The STROBE checklist is best used in conjunction with this article (freely available on the Web sites of PLoS Medicine at <http://www.plosmedicine.org/>, Annals of Internal Medicine at <http://www.annals.org/>, and Epidemiology at <http://www.epidem.com/>). Information on the STROBE Initiative is available at [www.strobe-statement.org](http://www.strobe-statement.org).

# BMJ Open

## Utilisation of mammography by women with mobility impairments in the United Kingdom: a secondary analysis of cross-sectional data

|                                 |                                                                                                                                                                                                               |
|---------------------------------|---------------------------------------------------------------------------------------------------------------------------------------------------------------------------------------------------------------|
| Journal:                        | <i>BMJ Open</i>                                                                                                                                                                                               |
| Manuscript ID                   | bmjopen-2018-024571.R2                                                                                                                                                                                        |
| Article Type:                   | Research                                                                                                                                                                                                      |
| Date Submitted by the Author:   | 29-Jan-2019                                                                                                                                                                                                   |
| Complete List of Authors:       | Sakellariou, Dikaios; Cardiff University, School of Healthcare Sciences<br>Rotarou, Elena; Universidad de Chile, Centre of Environmental and<br>Natural Resource Economics, Faculty of Economics and Business |
| <b>Primary Subject Heading</b>: | Oncology                                                                                                                                                                                                      |
| Secondary Subject Heading:      | Public health, Epidemiology, Health services research, Patient-centred<br>medicine                                                                                                                            |
| Keywords:                       | United Kingdom, women with mobility impairment, mammography,<br>preventive services, cancer screening                                                                                                         |
|                                 |                                                                                                                                                                                                               |

SCHOLARONE™  
Manuscripts

1  
2  
3 **Title: Utilisation of mammography by women with mobility impairments in the**  
4  
5 **United Kingdom: a secondary analysis of cross-sectional data**  
6  
7  
8  
9  
10

11 Dikaios Sakellariou<sup>1</sup> and Elena S. Rotarou<sup>2</sup>  
12  
13

14  
15  
16 <sup>1</sup>Dikaios Sakellariou

17  
18 Corresponding author: Cardiff University, School of Healthcare Sciences,  
19  
20 Eastgate House, Newport Road 35-43, Cardiff, CF24 0AB, UK  
21

22  
23 Email: [sakellarioud@cardiff.ac.uk](mailto:sakellarioud@cardiff.ac.uk)  
24

25 Telephone number: 02920687744  
26  
27

28  
29  
30 <sup>2</sup> Elena S. Rotarou

31  
32 University of Chile, Centre of Environmental and Natural Resource Economics,  
33  
34 Faculty of Economics and Business,  
35  
36 Diagonal Paraguay 257, Office 1506, Santiago, 8330015, Chile  
37

38  
39 Email: [erotarou@fen.uchile.cl](mailto:erotarou@fen.uchile.cl)  
40

41 Telephone number: (56-2) 978-3455  
42  
43  
44  
45

46 **Keywords:** women with mobility impairment; mammography; preventive services;  
47  
48 cancer screening; United Kingdom  
49  
50

51  
52 **Word count:** 3770  
53  
54  
55  
56  
57  
58  
59  
60

1  
2  
3 **Utilisation of mammography by women with mobility impairments**  
4  
5 **in the United Kingdom: a secondary analysis of cross-sectional data**  
6  
7  
8  
9

10 **ABSTRACT**

11  
12 **Objectives:** Research has shown that people with physical disabilities report lower  
13 utilisation of preventive services. The aim of this study was to examine whether  
14 women with mobility impairments have lower odds of utilising mammography  
15 compared to women with no such impairment, and explore the factors that are  
16 associated with lower utilisation.  
17  
18  
19  
20  
21  
22

23  
24 **Sample and Design:** We performed secondary analysis, using logistic regressions, of  
25 de-identified cross-sectional data from the European Health Interview Survey, Wave  
26 2. The sample included 9,491 women from across the UK, 2,697 of whom had  
27 mobility impairment. The survey method involved face-to-face and telephone  
28 interviews.  
29  
30  
31  
32  
33  
34

35 **Outcome measures:** Self-report of the last time a mammogram was undertaken.

36  
37 **Results:** Adjusting for various demographic and socioeconomic variables, women  
38 with mobility impairment had 1.3 times (CI 95%: .70-.92) lower odds of having a  
39 mammogram than women without mobility impairment. Concerning women with  
40 mobility impairment, married women had more than twice the odds of having a  
41 mammogram than women that had never been married (OR: 2.07, CI 95%: 1.49-  
42 2.88). Women from Scotland had 1.5 times (CI 95%: 1.08-2.10) higher odds of  
43 undertaking the test than women from England. Women with upper secondary  
44 education had 1.4 times (CI 95%: 1.10-1.67) higher odds of undergoing the test than  
45 women with primary or lower secondary education. Also, women from higher  
46 quintiles (third and fifth quintiles) had higher odds of utilising mammography, with  
47  
48  
49  
50  
51  
52  
53  
54  
55  
56  
57  
58  
59  
60

1  
2  
3 the women in the fifth quintile having 1.5 times (CI 95%: 1.02-2.15) higher odds than  
4  
5 women from the first quintile.  
6

7  
8 **Conclusions:** In order to achieve equitable access to mammography for all women, it  
9  
10 is important to acknowledge the barriers that impede women with mobility  
11  
12 impairment from using the service. These barriers can refer to structural disadvantage,  
13  
14 such as lower income and employment rate, transportation barriers, or previous  
15  
16 negative experiences, among others.  
17  
18

### 19 20 21 **Strengths and limitations of this study** 22

- 23  
24 • This study is based on a nationally-representative sample of community-  
25  
26 dwelling women.  
27
- 28  
29 • We use various demographic and socioeconomic variables to investigate the  
30  
31 association between these factors and mammography for women with mobility  
32  
33 impairment in the UK.  
34
- 35  
36 • Outcome measures were self-reported, which might have introduced response  
37  
38 bias.  
39
- 40  
41 • We cannot establish any causal links, due to the study's cross-sectional design.  
42  
43  
44  
45  
46  
47  
48  
49  
50  
51  
52  
53  
54  
55  
56  
57  
58  
59  
60

## INTRODUCTION

Research has shown that people with physical disabilities generally report worse access and utilisation of healthcare services, including preventive and screening services.[1-5] Several studies have evidenced how access to some cancer screening services can be compromised due to the presence of pre-existing physical disability.[6-11] A recent study in the UK showed that women with disabilities – including women with physical limitations – report worse access to healthcare compared to any other group, perhaps illustrating how gender and disability intersect to create structural disadvantage for disabled women.[3]

There are several reasons that have been associated with lower utilisation of healthcare services by people with disabilities, and for women in particular. These include, among other reasons, inaccessible healthcare facilities and/or equipment, lack of appropriate parking, lack of social support, and financial constraints, and the intersection of all these factors with gender-based structural disadvantage.[1,5, 8]

There are also several intangible barriers that negatively affect utilisation of healthcare services by disabled women; past negative experiences with healthcare professionals, being treated as a low-priority patient, not being adequately informed, or having their impairments ignored, are some of the reasons women give for the low utilisation of services, including mammography.[5-6]

Mammography is an important screening tool for breast cancer.[12] In well-resourced settings, which include most high-income countries, the World Health Organisation's position paper on mammography recommends population-based screening every two years for all women aged 50-69 years.[12] Several countries, including the US, Norway, Denmark, and the UK implement such national screening programmes.[13-17] A Cochrane systematic review showed that the benefits of

1  
2  
3 mortality decrease might be outweighed by over-diagnosis rates and higher rates of  
4 aggressive treatment, both of which were attributed to mammography.[18] However,  
5  
6 there is strong evidence showings that population-wide screening could lead to an  
7  
8 increase of early-cancer diagnosis, with a concomitant decrease of late-stage  
9  
10 diagnosis, hence leading to a mortality decrease.[12,19]  
11  
12  
13

14  
15 In the United Kingdom, women between the ages of 50 and 70 are invited to  
16  
17 undertake a mammogram every three years, as part of a national screening  
18  
19 programme by the National Health Service (NHS).[20] While there is evidence for  
20  
21 women in England,[21] little is known regarding mammography utilisation by women  
22  
23 with physical impairments across the UK; it is not known whether there is a  
24  
25 difference in the utilisation rates between women with and without any mobility  
26  
27 impairments, nor which are some of the factors associated with these utilisation rates.  
28  
29  
30

31  
32 Most of the existing evidence suggests that women with disabilities have  
33  
34 lower utilisation rates and worse access to mammography compared to women  
35  
36 without disabilities.[8,10,22-25] Transportation, quality of the experience, and lack of  
37  
38 appropriate information, are among the reasons given for this.[6,26] Several of these  
39  
40 studies are small-scale studies, which although they give important insights into the  
41  
42 experiences of women as they navigate the healthcare system, they do not allow any  
43  
44 conclusions regarding utilisation of preventive services at a population level. A recent  
45  
46 large prospective study showed that women with disabilities in England have lower  
47  
48 odds of having a mammogram compared to women without a disability.[21].  
49  
50

51  
52 In this article, we examine the utilisation of mammography by women with  
53  
54 lower limb mobility impairments in the UK. We use this term to refer to women who  
55  
56 report difficulty or inability to walk or climb stairs, as per the available data from the  
57  
58 European Health Interview Survey (EHIS, Wave 2). Our aim is to examine whether  
59  
60



1  
2  
3 women with lower limb mobility impairments have lower odds of utilising  
4  
5 mammography compared to women with no such impairment, and explore the factors  
6  
7 that are associated with lower utilisation.  
8  
9

10 This study seeks to add to the current body of evidence regarding utilisation of  
11  
12 mammography by disabled women, by producing population-level evidence, and  
13  
14 examining the association of a variety of demographic and socioeconomic factors –  
15  
16 such as low income or lack of social support – with utilisation of mammography. This  
17  
18 knowledge can inform policy and lead to the design of comprehensive support  
19  
20 systems and target interventions that would enable real access to services, addressing  
21  
22 not only the availability of services but also their utilisation.  
23  
24  
25  
26  
27

## 28 **METHODOLOGY**

### 29 **Survey**

30  
31 We performed secondary analysis, using logistic regressions, of de-identified cross-  
32  
33 sectional data from the European Health Interview Survey, Wave 2. The EHIS  
34  
35 collects health data of representative samples of population across European Union  
36  
37 member states, providing thus the possibility to compare health indicators between  
38  
39 countries. It is administered every five years.[27]  
40  
41  
42  
43  
44

45 The survey consists of four modules: a) demographic and socioeconomic  
46  
47 variables, such as age, sex, marital status, employment, education, etc.; b) variables  
48  
49 on health status, for example self-perceived general health, chronic conditions,  
50  
51 accidents, functional limitations in daily activities, etc.; c) variables on health care  
52  
53 use, such as consultations, unmet healthcare needs, preventive services, etc.; and d)  
54  
55 health determinants, for instance weight, smoking, alcohol consumption, exercise,  
56  
57 social support, etc.[28] The survey analyses 21 areas of health concerns and health-  
58  
59  
60

1  
2  
3 related behaviours, and 81 specific item-questions. All measures are self-reported.[29]

4  
5 For more information on the EHIS questionnaire, please refer to the survey

6  
7 website.[27,28]

8  
9  
10 The United Kingdom did not participate in the first EHIS wave (2006-2009),  
11 but it did take part in the second wave. Data was collected for residents in private  
12 households, over 16 years of age, residing in England, Wales, Scotland, and Northern  
13 Ireland. For Great Britain, data was collected between April 2013 and March 2014 by  
14 the Office for National Statistics. Data for Northern Ireland was collected between  
15 April and September 2014 by the Northern Ireland Statistics and Research Agency. In  
16 Great Britain, the survey was conducted as a follow-up to the Labour Force Survey;  
17 individuals who did not object in their final wave of contact, in the sampled  
18 households, completed the EHIS Wave 2 questionnaire. In Northern Ireland, a simple  
19 random sample of households on the Land and Property Services Agency property  
20 gazetteer was used. In total, the UK survey included 20,161 observations, a sample  
21 size which was much higher than the estimated minimum effective size for the  
22 country, which was 13,085.[30]

23  
24 The interviews involved both face-to-face (20%) and telephone interviews  
25 (80%). For the face-to-face interviews, the interviewers conducted Computer-Assisted  
26 Personal Interviews (CAPI) using laptops at the address of the respondents, while for  
27 the telephone interviews, Computer-Assisted Telephone Interviews (CATI) were  
28 conducted. The CAPI and CATI questionnaires were generally similar, with only  
29 minor changes to account for the different mode of interviewing.[30]

30  
31 The microdata did not contain any personal information, such as names or  
32 addresses, which would allow direct identification. In order to ensure confidentiality,  
33 a set of anonymisation rules was applied.[31] Access to microdata is granted only for  
34  
35  
36  
37  
38  
39  
40  
41  
42  
43  
44  
45  
46  
47  
48  
49  
50  
51  
52  
53  
54  
55  
56  
57  
58  
59  
60

1  
2  
3 scientific purposes; we were granted access by the UK Data Service  
4  
5 (www.ukdataservice.ac.uk).  
6  
7  
8  
9

### 10 **Data and variables**

11  
12 There are two questions in the EHIS that measure mobile difficulty: a) variable PL6,  
13  
14 “Difficulty in walking half a km on level ground without the use of any aid”, and b)  
15  
16 variable PL7, “Difficulty in walking up or down 12 steps”. These two variables were  
17  
18 merged into a new variable, called ‘mobility impairment’, with answers ‘without  
19  
20 difficulty’ (women that answered that they had no difficulty in performing either  
21  
22 tasks), and ‘with difficulty’ (women that replied that they had some difficulty in  
23  
24 performing or were unable to do at least one of the tasks).  
25  
26  
27

28  
29 Our dependent variable, “up to date with mammography”, was recoded and  
30  
31 was binary, that is, ‘Yes’ (included the answers “within the last 12 months”, “1 to less  
32  
33 than 2 years”, and “2 to less than 3 years”), and ‘No’ (“more than 3 years” and  
34  
35 “never”). This recoding was done according to the NHS guidelines on  
36  
37 mammography.[26] Previous research has also employed this variable, looking at  
38  
39 women being up to date with mammography.[10]  
40  
41

42  
43 In total, we had 9,995 observations for women that answered the question on  
44  
45 mammography. Since STATA, by default, performs listwise-deletion and displays  
46  
47 calculations that have non-missing values on all variables listed, our total sample size  
48  
49 was 9,491 observations (6,794 observations for women without mobility impairment,  
50  
51 and 2,697 for women with mobility impairment). Since only a very small percentage  
52  
53 of observations was deleted, we decided not to proceed to maximum likelihood or  
54  
55 multiple imputation.[32] The sample is representative of the target population (test  
56  
57 results available upon request).  
58  
59  
60

The control variables included the following: a) *age*: 20-49 / 50-69 / 70+ (while the target group is 50-69-year-old women, the survey showed that almost 30% of women outside the target group have undertaken a mammogram); b) *civil status*: never married / married / widowed / divorced; c) *region*: England / Wales / Scotland / Northern Ireland; d) *urbanisation*: thinly-populated area / moderate-populated area / densely-populated area; e) *education*: primary and lower secondary / upper secondary / post-secondary and tertiary, short / tertiary; f) *income quintiles* (net monthly equivalised household income): 1<sup>st</sup> quintile / 2<sup>nd</sup> quintile / 3<sup>rd</sup> quintile / 4<sup>th</sup> quintile / 5<sup>th</sup> quintile; g) *employment*: unemployed / employed / inactive; h) *health self-assessment*: bad (answers ‘bad’ and ‘very bad’) / fair (answer ‘fair’) / good (answers ‘good’ and ‘very good’); and i) *help from neighbours* (how easy it is to get help from neighbours in case of need): difficult / possible / easy.

All analyses were performed using STATA/MP version 14.2.

### Patient and Public Involvement

Patients were not directly involved in the design or conduct of this study. However, the research aim was informed by patients’ priorities, and experiences, as these were communicated through patient and public involvement in a previous study (the Challenges of Cancer and Disability Study, Tenovus TIG2017-05).

## RESULTS

Table 1 summarises the characteristics of the study sample.

**Table 1:** Comparison between women with and without mobility impairment

| Parameter | Women without mobility | Women with mobility | <i>p</i> value, chi-squared |
|-----------|------------------------|---------------------|-----------------------------|
|-----------|------------------------|---------------------|-----------------------------|

|                                            | impairment<br>(n=6,794) |      | impairment<br>(n=2,697) |      | test         |
|--------------------------------------------|-------------------------|------|-------------------------|------|--------------|
|                                            | n                       | %    | n                       | %    |              |
| <b>Age groups</b>                          |                         |      |                         |      |              |
| 20-49 (n=3,270)                            | 2,919                   | 43.0 | 351                     | 13.0 | $p < 0.0001$ |
| 50-69 (n=3,971)                            | 2,839                   | 42.8 | 1,132                   | 42.0 |              |
| 70+ (n=2,250)                              | 1,036                   | 15.3 | 1,214                   | 45.1 |              |
| <b>Civil status</b>                        |                         |      |                         |      |              |
| Never married (n=1,515)                    | 1,259                   | 18.5 | 256                     | 9.5  | $p < 0.0001$ |
| Married (n=5,386)                          | 4,097                   | 60.3 | 1,289                   | 47.8 |              |
| Widowed (n=1,324)                          | 604                     | 8.9  | 720                     | 26.7 |              |
| Divorced (n=1,266)                         | 834                     | 12.3 | 432                     | 16.0 |              |
| <b>Region</b>                              |                         |      |                         |      |              |
| England (n=7,895)                          | 5,695                   | 83.8 | 2,200                   | 81.6 | $p < 0.0001$ |
| Wales (n=421)                              | 269                     | 4.0  | 152                     | 5.6  |              |
| Scotland (n=822)                           | 596                     | 8.8  | 226                     | 8.4  |              |
| Northern Ireland (n=353)                   | 234                     | 3.4  | 119                     | 4.4  |              |
| <b>Urbanisation</b>                        |                         |      |                         |      |              |
| Thinly-populated area (n=1,322)            | 945                     | 13.9 | 377                     | 14.0 | $p = 0.992$  |
| Moderate-populated area (n=2,575)          | 1,842                   | 27.1 | 733                     | 27.2 |              |
| Densely-populated area (n=5,594)           | 4,007                   | 59.0 | 1,587                   | 58.8 |              |
| <b>Education</b>                           |                         |      |                         |      |              |
| Primary / lower secondary (n=3,040)        | 1,699                   | 25.0 | 1,341                   | 49.7 | $p < 0.0001$ |
| Upper secondary (n=3,223)                  | 2,394                   | 35.2 | 829                     | 30.7 |              |
| Post secondary / tertiary, short (n=1,495) | 1,156                   | 17.0 | 339                     | 12.6 |              |
| Tertiary (n=1,733)                         | 1,545                   | 22.7 | 188                     | 7.0  |              |
| <b>Income quintiles</b>                    |                         |      |                         |      |              |
| 1 <sup>st</sup> quintile (n=1,962)         | 1,108                   | 16.3 | 854                     | 31.7 | $p < 0.0001$ |
| 2 <sup>nd</sup> quintile (n=2,008)         | 1,336                   | 19.7 | 672                     | 24.9 |              |
| 3 <sup>rd</sup> quintile (n=1,932)         | 1,352                   | 19.9 | 580                     | 21.5 |              |
| 4 <sup>th</sup> quintile (n=1,852)         | 1,493                   | 22.0 | 359                     | 13.3 |              |
| 5 <sup>th</sup> quintile (n=1,737)         | 1,505                   | 22.2 | 232                     | 8.6  |              |
| <b>Employment</b>                          |                         |      |                         |      |              |
| Unemployed (n=360)                         | 271                     | 4.0  | 89                      | 3.3  | $p < 0.0001$ |
| Employed (n=4,304)                         | 3,836                   | 56.5 | 468                     | 17.4 |              |
| Inactive (n=4,827)                         | 2,687                   | 39.6 | 2,140                   | 79.4 |              |
| <b>Health self-assessment</b>              |                         |      |                         |      |              |
| Bad (n=797)                                | 90                      | 1.3  | 707                     | 26.2 | $p < 0.0001$ |
| Fair (n=1,896)                             | 774                     | 11.4 | 1,122                   | 41.6 |              |

|                             |                     |       |      |       |      |              |
|-----------------------------|---------------------|-------|------|-------|------|--------------|
|                             | Good (n=6,798)      | 5,930 | 87.3 | 868   | 32.2 |              |
| <b>Help from neighbours</b> |                     |       |      |       |      |              |
|                             | Difficult (n=1,312) | 805   | 11.9 | 507   | 18.8 |              |
|                             | Possible (n=1,923)  | 1,426 | 21.0 | 497   | 18.4 | $p < 0.0001$ |
|                             | Easy (n=6,256)      | 4,563 | 67.2 | 1,693 | 62.8 |              |

Note: For more information on the variables, please see the EHIS Wave 2 methodological manual.[28]

Some of the points presented in Table 1 are of particular interest. Firstly, concerning education, about half of women with mobility impairment had only primary or lower secondary education, as opposed to only a quarter of women without any mobility impairment; a much higher percentage of women from the latter group had also attended tertiary education. Secondly, more women with mobility impairment (32%) belonged to the first income quintile than women with no mobility impairment (16%). Less than 9% of women from the former group belonged to the richest segment; this percentage was more than 22% for women without any mobility impairment. Thirdly, the percentage of women with mobility impairment that were inactive was double (i.e. almost 80%) than that of women without any mobility problems. All these points underline the structural disadvantage faced by women with mobility impairment in the UK: lower education and lower income, coupled with a much higher likelihood of being inactive employment-wise.

Figure 1 shows the percentage of women (total sample, including both women with and without mobility impairment) that have undertaken mammography, by age group.

[Please place Figure 1 here]

1  
2  
3 As it can be seen in Figure 1, 71% of all women who undertook mammography were  
4 in the target group, i.e. 50-69 years of age. Almost 30% of all women that underwent  
5 the test were outside the target group. In certain parts of England, women younger  
6 than 50 and older than 70 years are invited for mammograms, [33], while a systematic  
7 review has shown that women out of the target group also undergo  
8 mammography.[18]  
9

10  
11  
12  
13  
14  
15  
16  
17 Figure 2 shows women with and without mobility impairments that have  
18 undertaken mammography, by age group.  
19

20  
21  
22 [Please place Figure 2 here]  
23

24  
25  
26 Figure 2 shows that almost 30% of women with mobility impairment that undertook  
27 mammography were 70+ years-old, i.e. outside the target group; this percentage is  
28 less than half of that for women without mobility impairment.  
29

30  
31  
32  
33 We performed logistic regressions to see whether there was any difference in  
34 utilisation rates of mammography between women with and without mobility  
35 impairment in the UK, and to investigate the factors associated with such rates. The  
36 first logistic regression – which included all the variables of Table 1 – showed that  
37 women with mobility impairment had 1.3 times lower odds of undertaking a  
38 mammogram than women without mobility problems (OR: .80, 95% CI = .70-.92,  
39 p=.002) (full results not presented here but available upon request).  
40  
41  
42  
43  
44  
45  
46  
47  
48

49  
50 Next, Table 2 presents possible factors associated with having a mammogram  
51 for women with mobility impairment in the UK. Model (1) presents age-adjusted odds  
52 ratios. Model (2) incorporates other demographic and socioeconomic variables, while  
53 Model (3) presents the fully-adjusted odds ratios (includes all variables of Table 1).  
54  
55  
56  
57  
58  
59  
60

**Table 2:** Factors associated with utilisation rates of mammography by women with mobility impairment in the UK

| Variables                                            | Model (1) |            | Model (2) |             | Model (3) |            |
|------------------------------------------------------|-----------|------------|-----------|-------------|-----------|------------|
|                                                      | OR        | 95% CI     | OR        | 95% CI      | OR        | 95% CI     |
| <b>Age groups (20-49 as reference)</b>               |           |            |           |             |           |            |
| 50-69                                                | 11.57***  | 8.67-15.44 | 11.99***  | 8.78- 16.38 | 12.12***  | 8.85-16.61 |
| 70+                                                  | 1.69***   | 1.27-2.25  | 1.96***   | 1.39-2.75   | 1.94***   | 1.37- 2.74 |
| <b>Civil status (never married as reference)</b>     |           |            |           |             |           |            |
| Married                                              |           |            | 2.05***   | 1.48-2.85   | 2.07***   | 1.49-2.88  |
| Widowed                                              |           |            | .934      | .65-1.34    | .95       | .66-1.37   |
| Divorced                                             |           |            | 1.44      | 1.00-2.08   | 1.46*     | 1.01-2.12  |
| <b>Regions (England as reference)</b>                |           |            |           |             |           |            |
| Wales                                                |           |            | 1.00      | .68-1.48    | 1.01      | .68-1.49   |
| Scotland                                             |           |            | 1.48*     | 1.06-2.05   | 1.51*     | 1.08-2.10  |
| Northern Ireland                                     |           |            | .91       | .58-1.41    | .90       | .57-1.40   |
| <b>Urbanisation (thinly-populated as reference)</b>  |           |            |           |             |           |            |
| Intermediate-populated area                          |           |            | .89       | .67-1.19    | .90       | .67-1.20   |
| Densely-populated area                               |           |            | .77       | .59-1.01    | .77       | .59-1.01   |
| <b>Education (primary/lower secondary as ref.)</b>   |           |            |           |             |           |            |
| Upper secondary                                      |           |            | 1.33**    | 1.08-1.64   | 1.36**    | 1.10-1.67  |
| Post secondary and tertiary, short                   |           |            | 1.20      | .91-1.58    | 1.21      | .91-1.60   |
| Tertiary                                             |           |            | .88       | .61-1.28    | .88       | .60-1.28   |
| <b>Employment (unemployed as reference)</b>          |           |            |           |             |           |            |
| Employed                                             |           |            | .94       | .54-1.66    | .93       | .53-1.63   |
| Inactive                                             |           |            | 1.29      | .76-2.20    | 1.30      | .76-2.22   |
| <b>Income (1<sup>st</sup> quintile as reference)</b> |           |            |           |             |           |            |
| 2 <sup>nd</sup> quintile                             |           |            | 1.11      | .88-1.40    | 1.09      | .86-1.38   |
| 3 <sup>rd</sup> quintile                             |           |            | 1.32*     | 1.03-1.69   | 1.29**    | 1.01-1.66  |
| 4 <sup>th</sup> quintile                             |           |            | 1.18      | .87-1.59    | 1.18      | .87-1.60   |
| 5 <sup>th</sup> quintile                             |           |            | 1.46*     | 1.01-2.11   | 1.49**    | 1.02-2.15  |
| <b>Health self-assessment (bad as reference)</b>     |           |            |           |             |           |            |
| Fair                                                 |           |            |           |             | 1.14      | .91-1.42   |
| Good                                                 |           |            |           |             | 1.11      | .87-1.42   |
| <b>Support from neighbours (difficult as ref.)</b>   |           |            |           |             |           |            |
| Possible                                             |           |            |           |             | 1.08      | .81-1.45   |
| Easy                                                 |           |            |           |             | 1.07      | .85-1.35   |
| <b>Observations</b>                                  |           | 2,790      |           | 2,738       |           | 2,697      |
| <b>Pseudo R<sup>2</sup></b>                          |           | 0.1636     |           | 0.1908      |           | 0.1923     |



|                                |          |          |          |
|--------------------------------|----------|----------|----------|
| <b>Chi<sup>2</sup> (21)</b>    | 631.29   | 722.80   | 718.04   |
| <b>Prob&gt;Chi<sup>2</sup></b> | 0.0000   | 0.0000   | 0.0000   |
| <b>McFadden R<sup>2</sup></b>  | 0.162    | 0.179    | 0.180    |
| <b>Deviance</b>                | 3228.188 | 3066.311 | 3015.368 |
| <b>AIC</b>                     | 3234.188 | 3106.311 | 3063.368 |
| <b>BIC</b>                     | 3251.989 | 3224.610 | 3204.965 |

\*  $p < 0.05$ , \*\*  $p < 0.01$ , \*\*\*  $p < 0.001$

Due to a higher Mac Fadden R<sup>2</sup>, and lower deviance, and AIC and BIC values, Model (3) provided a better fit than the previous two models. There was no collinearity affecting the results, with mean variance inflation factor (VIF) of 2.21.

As it can be seen in Table 2, the target group for having a mammogram (i.e. the 50-69 group) was the one with the highest odds of undertaking it: women in this age subgroup had 12 times higher odds of having this screening than women in the 20-49 subgroup. Regarding civil status, married women had more than twice the odds of having a mammogram than women that had never been married; divorced women had 1.5 times higher odds. Women with mobility impairment in Scotland had 1.5 times higher odds of having the mammogram than women in England. Women with upper secondary education had 1.4 times higher odds to have a mammogram than women with primary or lower secondary education. Also, women from higher income quintiles (third and fifth quintiles) had higher odds of undertaking the mammogram, with the women in the fifth quintile having 1.5 times higher odds than women from the first quintile.

## DISCUSSION

In this study, we investigated whether women with mobility impairment in the UK were less likely to be up to date with mammography compared to women with no mobility impairment, and explored some of the factors associated with lower

1  
2  
3 utilisation. The results showed a statistically significant difference between women  
4  
5 with and without mobility impairment, with women with mobility impairment having  
6  
7 1.3 times lower odds of undertaking a mammogram than women without mobility  
8  
9 impairment. Furthermore, the results showed a positive association between married  
10  
11 civil status, high income, educational attainment, and living in Scotland, and being up  
12  
13 to date with mammography.  
14  
15

16  
17 One of the strengths of the study is that it is based on data from a nationally-  
18  
19 representative sample. It also adds to the body of literature by examining the  
20  
21 association of several factors with mammography utilisation for women with mobility  
22  
23 impairment, an issue that has been generally little explored, particularly in the UK.  
24  
25

26  
27 One of the limitations of the study is that while we established associations  
28  
29 between various factors and utilisation of mammography by women with mobility  
30  
31 impairment, we cannot infer causality due to the cross-sectional nature of the data.  
32  
33 Another limitation of the study is that there is no information in the EHIS on the  
34  
35 reasons that influence utilisation of mammography. Furthermore, the EHIS relies on  
36  
37 self-reporting information, which leaves the instrument open to response bias;  
38  
39 however, there is no relevant information on this aspect. Another limitation of the  
40  
41 study is the way mobility impairment was defined, which potentially included women  
42  
43 with only short-term impairment, together with women with longer-term impairment;  
44  
45 this might have had an impact on external validity.  
46  
47  
48

49  
50 The findings showed that women with mobility impairment had 1.3 lower  
51  
52 odds of being up to date with mammography. This is consistent with previous  
53  
54 research that shows that in the UK, there are long-standing inequalities between  
55  
56 people's cancer experiences.[34] This finding is also consistent with research findings  
57  
58 from a study in England. [25] Bone et al. performed an analysis of data from the  
59  
60

1  
2  
3 National Cancer Patient Experience Survey.[35] They analysed data from 71,793  
4  
5 cancer patients and found evidence that cancer patients with long-standing conditions  
6  
7 in England, including people with physical conditions and disabilities, reported poorer  
8  
9 care. These inequalities persisted even when controlling for other factors. Further to  
10  
11 this, people with pre-existing disability diagnosed with cancer report low satisfaction  
12  
13 and use of services.[7-8, 36] As Liu and Clark have shown, quality of the experience  
14  
15 matters;[37] previous negative experiences with mammography might deter women  
16  
17 with physical impairments from undertaking the test in the future.  
18  
19  
20

21 The findings also showed that married women had higher odds of having a  
22  
23 mammogram than women that had never been married. This result is in accordance  
24  
25 with evidence demonstrating the protective role of married civil status.[23,38] Indeed,  
26  
27 married people tend to have more fixed residence, regular doctors, and fixed  
28  
29 healthcare places, and therefore are more likely to be informed and accept preventive  
30  
31 health services than unmarried people.[38] They have also a stronger social network  
32  
33 (for example, family members, relatives, and friends) that can offer them more  
34  
35 emotional and practical support (for instance, transportation) to attend such  
36  
37 screenings, as well as help them adopt healthier behaviours.  
38  
39  
40  
41

42 Our study also revealed that there are differences in the utilisation rates of  
43  
44 mammography between women living in different regions in the United Kingdom,  
45  
46 with women with mobility impairment living in Scotland having higher odds of  
47  
48 undertaking the test than women in England. The reason behind this might be the  
49  
50 usage of mobile screening units in Scotland, which appears to enable access to  
51  
52 mammography for underserved populations.[39]  
53  
54  
55

56 Furthermore, our study showed that women with mobility impairments with  
57  
58 higher education had higher odds of having a mammogram than women with primary  
59  
60

1  
2  
3 or lower secondary education. Women with mobility impairment that belonged to  
4  
5 higher income quintiles had also higher odds of having a mammogram than women  
6  
7 belonging to the first quintile. This result agrees with previous research that found  
8  
9 that disabled women with higher education and an overall higher socioeconomic  
10  
11 status were more likely to undertake preventive exams.[40-41] Educational attainment  
12  
13 beyond upper secondary did not seem to have any further positive effect on the uptake  
14  
15 of mammography.  
16  
17

18  
19 These inequalities in the experiences of patients with cancer in the UK conflict  
20  
21 with several of the recommendations of recent strategic documents, including  
22  
23 ‘Achieving world-class cancer outcomes: a Strategy for England 2015-2020’ and the  
24  
25 Cancer Delivery Plan for Wales.[42,43] Both documents call for access to equitable  
26  
27 care, achieving the best experience, and promoting delivery of cancer care responsive  
28  
29 to individual needs.  
30  
31

32  
33 Overall, taking into account the global demographic, epidemiological, and  
34  
35 socioeconomic changes – including ageing, urbanisation, reduction in morbidity and  
36  
37 mortality rates, and increase in chronic diseases – it is essential that preventive health  
38  
39 services are better promoted and reach all people, especially disadvantaged groups,  
40  
41 such as people with disabilities, women, and the poor. The WHO position paper on  
42  
43 mammography states that:  
44  
45

46  
47 “Population-based screening programmes identify and individually invite each  
48  
49 person in the eligible population to attend each round of screening so that each  
50  
51 person in the eligible population has an equal chance of benefiting from  
52  
53 screening.” (p.23).[12]  
54  
55

56 This statement, however, overlooks the fact that not everyone has an equal chance of  
57  
58 benefitting from screening; people with mobility impairment may, for example, face  
59  
60

1  
2  
3 transportation barriers, which could stop them from accessing screening services,  
4  
5 despite their availability. Women with mobility impairment, and disabilities in  
6  
7 general, are further disadvantaged, as they also face structural disadvantage – in the  
8  
9 form of lower education, lower income, and greater poverty – than men, as shown in  
10  
11 this study and supported by a body of existing research.[44-45] In order to enhance  
12  
13 the utilisation of mammography (and possibly the use of other preventive services), it  
14  
15 is important to acknowledge the barriers that stop women from using the service and  
16  
17 adopt measures that would lead to a more equitable utilisation. The wide adoption of  
18  
19 mobile screening units might be a way to improve access for this population. This  
20  
21 needs to be complemented by increased disability-awareness for healthcare  
22  
23 professionals, making them sensitive to addressing impairment-specific needs in order  
24  
25 to achieve inclusive services for all.  
26  
27  
28  
29  
30  
31  
32

### 33 **Acknowledgments**

34  
35 We wish to thank Gill Tyrer for her contribution as a patient and public representative  
36  
37 in a previous project (Tenovus, TIG2017-05), which offered the stimulus to explore  
38  
39 barriers to cancer screening for this population.  
40  
41  
42  
43  
44

### 45 **Contributors**

46  
47 DS and ESR jointly conceived the final research question and aims and objectives,  
48  
49 reviewed the literature, produced the analysis plan and carried out the analysis, and  
50  
51 drafted the manuscript.  
52  
53

### 54 **Funding**

55  
56 None declared.  
57

### 58 **Competing interests**

1  
2  
3 None declared.  
4

5 **Ethics approval**

6  
7  
8 None required.  
9

10 **Data sharing statement**

11  
12 Technical appendix and dataset available from the UK Data Service.  
13

14 <https://discover.ukdataservice.ac.uk/catalogue/?sn=7881>  
15  
16  
17  
18  
19  
20  
21  
22  
23  
24  
25  
26  
27  
28  
29  
30  
31  
32  
33  
34  
35  
36  
37  
38  
39  
40  
41  
42  
43  
44  
45  
46  
47  
48  
49  
50  
51  
52  
53  
54  
55  
56  
57  
58  
59  
60

## References

- 1 Iezzoni LI, McCarthy EP, Davis RB, et al. Mobility impairments and use of screening and preventive services. *Am J Public Health* 2000;90(6):955.
- 2 Kroll T, Jones GC, Kehn M, et al. Barriers and strategies affecting the utilisation of primary preventive services for people with physical disabilities: a qualitative inquiry. *Health Soc Care Community* 2006;14(4):284-93.
- 3 Sakellariou D, Rotarou ES. Access to healthcare for men and women with disabilities in the UK: secondary analysis of cross-sectional data. *BMJ Open* 2017;7(8):e016614. doi: 10.1136/bmjopen-2017-016614. (accessed 23 May 2018).
- 4 Popplewell NT, Rechel BP, Abel GA. How do adults with physical disability experience primary care? A nationwide cross-sectional survey of access among patients in England. *BMJ Open* 2014;4:e004714. doi: <http://bmjopen.bmj.com/content/4/8/e004714> (accessed 23 May 2018).
- 5 Gibson J, O'Connor R. Access to health care for disabled people: a systematic review. *Social Care and Neurodisability* 2010;1:21–31.
- 6 Llewellyn G, Balandin S, Poulos A, et al. Disability and mammography screening: intangible barriers to participation. *Disabil Rehabil* 2011;33(19-20):1755-1767.
- 7 Angus J, Seto L, Barry N, et al. Access to cancer screening for women with mobility disabilities. *J of Cancer Educ* 2012;27(1):75-82.
- 8 Peters K, Cotton A. Barriers to breast cancer screening in Australia: Experiences of women with physical disabilities. *J Clin Nurs* 2015;24(3-4):563-572.
- 9 Devaney J, Seto L, Barry N, et al. Navigating healthcare: gateways to cancer screening. *Disabil Soc* 2009;24(9):739-751.

- 1  
2  
3 10 Horner-Johnson W, Dobbertin K, Andresen EM, et al. Breast and cervical cancer  
4 screening disparities associated with disability severity. *Womens Health Issues*  
5 2014;24(1):e147-53.  
6  
7  
8  
9  
10 11 Iezzoni LI, McCarthy EP, Davis RB, et al. Use of screening and preventive  
11 services among women with disabilities. *Am J Med Qual* 2001;16(4):135-44.  
12  
13  
14 12 World Health Organization. WHO Position Paper On Mammography Screening.  
15 World Health Organization; 2014.  
16  
17  
18  
19 13 Weedon-Fekjær H, Romundstad PR, Vatten LJ. Modern mammography screening  
20 and breast cancer mortality: population study. *BMJ* 2014;348:g3701.  
21  
22  
23  
24 14 Bleyer A, Welch HG. Effect of three decades of screening mammography on  
25 breast-cancer incidence. *N Engl J Med* 2012;367(21):1998-2005.  
26  
27  
28  
29 15 Broeders M, Moss S, Nyström L, et al. The impact of mammographic screening on  
30 breast cancer mortality in Europe: a review of observational studies. *J Med Screen*  
31 2012;19(1\_suppl):14-25.  
32  
33  
34  
35 16 Jørgensen KJ, Zahl PH, Gøtzsche PC. Breast cancer mortality in organised  
36 mammography screening in Denmark: comparative study. *BMJ* 2010;340:c1241.  
37  
38  
39  
40 17 Rafia R, Brennan A, Madan J, et al. Modeling the cost-effectiveness of alternative  
41 upper age limits for breast cancer screening in England and Wales. *Value Health*  
42 2016;19(4):404-12.  
43  
44  
45  
46 18 Gøtzsche PC, Jørgensen KJ. Screening for breast cancer with mammography.  
47 Cochrane Database Syst Rev;2013;6: CD001877.  
48  
49  
50  
51 19 Kerlikowske K, Grady D, Rubin SM, et al. Efficacy of screening mammography: a  
52 meta-analysis. *JAMA* 1995;273(2):149-54.  
53  
54  
55  
56 20 National Health Service. Breast Cancer Screening.  
57  
58 <https://www.nhs.uk/conditions/breast-cancer-screening/> (accessed 29 May 2018).  
59  
60



- 1  
2  
3 21 Floud S, Barnes I, Verfürden M, et al. Disability and participation in breast and  
4  
5 bowel cancer screening in England: a large prospective study. *Br J Cancer* 2017  
6  
7 Nov;117(11):1711.  
8  
9  
10 22 Todd A, Stuijbergen A. Breast cancer screening barriers and disability. *Rehabil*  
11  
12 *Nurs* 2012;37(2):74-9.  
13  
14 23 Iezzoni LI, Kilbridge K, Park ER. Physical access barriers to care for diagnosis  
15  
16 and treatment of breast cancer among women with mobility impairments. *Oncol Nurs*  
17  
18 *Forum* 2010;37:711.  
19  
20 24 Iezzoni LI, Park ER, Kilbridge KL. Implications of mobility impairment on the  
21  
22 diagnosis and treatment of breast cancer. *J Womens Health* 2011;20(1):45-52.  
23  
24 25 Sakellariou D, Rotarou ES. Utilisation of cancer screening services by disabled  
25  
26 women in Chile. *PloS One* 2017;12(5):e0176270.  
27  
28  
29  
30  
31 <https://doi.org/10.1371/journal.pone.0176270> (accessed 23 May 2018).  
32  
33 26 Barr JK, Giannotti TE, Hoof TJ, et al. Understanding barriers to participation in  
34  
35 mammography by women with disabilities. *Am J Health Promot* 2008;22(6):381-5.  
36  
37 27 Eurostat. European Health Interview Survey (EHIS). Description of the dataset.  
38  
39 No date. <http://ec.europa.eu/eurostat/web/microdata/european-health-interview-survey>  
40  
41 (accessed 17 May 2018).  
42  
43 28 Eurostat. European Health Interview Survey (EHIS wave 2). Methodological  
44  
45 manual. Eurostat Methodologies and Working Papers. Luxembourg: Publications  
46  
47 Office of the European Union. 2013.  
48  
49  
50  
51 [https://ec.europa.eu/eurostat/documents/3859598/5926729/KS-RA-13-018-](https://ec.europa.eu/eurostat/documents/3859598/5926729/KS-RA-13-018-EN.PDF/26c7ea80-01d8-420e-bdc6-e9d5f6578e7c)  
52  
53 [EN.PDF/26c7ea80-01d8-420e-bdc6-e9d5f6578e7c](https://ec.europa.eu/eurostat/documents/3859598/5926729/KS-RA-13-018-EN.PDF/26c7ea80-01d8-420e-bdc6-e9d5f6578e7c). (accessed 23 November 2018).  
54  
55  
56  
57  
58  
59  
60

1  
2  
3 29 Office for National Statistics. Health indicators for the United Kingdom and its  
4 constituent countries based on the 2013 to 2014 European Health Interview Survey,  
5 (Wave 2) 2015. <http://webarchive.nationalarchives.gov.uk/> (accessed 23 May 2018).  
6  
7  
8  
9

10 30 Office for National Statistics, Northern Ireland Statistics and Research Agency.  
11 *European Health Interview Survey: United Kingdom Data, Wave 2, 2013-2014*. UK  
12 Data Service SN: 7881 2016 <https://discover.ukdataservice.ac.uk/catalogue/?sn=7881>  
13 (accessed 17 May 2018).  
14  
15  
16  
17  
18

19 31 Eurostat. European Health Interview Survey (EHIS). Reference Metadata in Euro  
20 SDMX Metadata Structure (ESMS). 2016.  
21 [http://ec.europa.eu/eurostat/cache/metadata/en/hlth\\_det\\_esms.htm#conf14728059019](http://ec.europa.eu/eurostat/cache/metadata/en/hlth_det_esms.htm#conf14728059019)  
22 [15](#) (accessed 20 May 2018).  
23  
24  
25  
26  
27

28 32 Allison P. Listwise deletion: It's NOT evil. Statistical Horizons.  
29 <http://statisticalhorizons.com/listwise-deletion-its-not-evil> (accessed 30 May 2018).  
30  
31  
32

33 33 Cancer Research UK. Breast screening. 2017.  
34 [https://www.cancerresearchuk.org/about-cancer/breast-cancer/screening/breast-](https://www.cancerresearchuk.org/about-cancer/breast-cancer/screening/breast-screening)  
35 [screening](#) (accessed 24 November 2018)  
36  
37  
38  
39

40 34 All Party Parliamentary Group on Cancer. Report of the All Party Parliamentary  
41 Group on Cancer's Inquiry into Inequalities in Cancer. Cardiff: Welsh Government  
42 2009.  
43 [http://www.macmillan.org.uk/Documents/Campaigns/InquiryintoInequalitiesReport.p](http://www.macmillan.org.uk/Documents/Campaigns/InquiryintoInequalitiesReport.pdf)  
44 [df](#) (accessed 30 May 2018).  
45  
46  
47  
48  
49

50 35 Bone A, Mc Grath-Lone L, Day S, et al. Inequalities in the care  
51 experiences of patients with cancer: Analysis of data from the National Cancer Patient  
52 Experience Survey 2011-2012. *BMJ Open* 2014;4:e004567. doi: 10.1136/bmjopen-  
53 2013-004567 (accessed 30 May 2018).  
54  
55  
56  
57  
58  
59  
60

- 1  
2  
3 36 Merten J W. Barriers to cancer screening for people with disabilities: A literature  
4 review. *Disabil Health J* 2015;8(1):9-16.  
5  
6  
7  
8 37 Liu SY, Clark MA. Breast and cervical cancer screening practices among disabled  
9 women aged 40–75: does quality of the experience matter? *J Womens Health*  
10 2008;7(8):1321-9.  
11  
12  
13  
14 38 Yen SM, Kung PT, Tsai WC. Factors associated with free adult preventive health  
15 care utilization among physically disabled people in Taiwan: nationwide population-  
16 based study. *BMC Health Serv Res* 2014;4(1):610.  
17  
18  
19  
20 39 Leung J, Macleod C, McLaughlin D, Woods LM, et al. Screening mammography  
21 uptake within Australia and Scotland in rural and urban populations. *Prev Med Rep*  
22 2015;2:559-62.  
23  
24  
25  
26 40 Hewitt M, Devesa SS, Breen N. Cervical cancer screening among US women:  
27 analyses of the 2000 National Health Interview Survey. *Prev Med* 2004;39(2):270-8.  
28  
29  
30  
31 41 Rodríguez MA, Ward LM, Pérez-Stable EJ. Breast and cervical cancer screening:  
32 impact of health insurance status, ethnicity, and nativity of Latinas. *Ann Fam Med*  
33 2005;3(3):235-41.  
34  
35  
36  
37 42 Independent Cancer Taskforce. Achieving World-Class Cancer Outcomes: a  
38 Strategy for England 2015-2020. 2016. [http://www.cancerresearchuk.org/about-](http://www.cancerresearchuk.org/about-us/cancer-strategy-in-england)  
39 [us/cancer-strategy-in-england](http://www.cancerresearchuk.org/about-us/cancer-strategy-in-england)  
40 (accessed 30 May 2018).  
41  
42  
43  
44 43. Welsh Government. Together for Health- Cancer Delivery Plan; A Delivery Plan  
45 up to 2016 for NHS Wales and its Partners. Cardiff: Welsh Government 2012.  
46  
47  
48  
49 44 Yeo R, Moore K. Including disabled people in poverty reduction work: “Nothing  
50 about us, without us”. *World Dev* 2003;31(3):571-90.  
51  
52  
53  
54  
55  
56  
57  
58  
59  
60

1  
2  
3 45 Pinto PC. Women, disability, and the right to health. *In* Gender and Women's  
4  
5 Studies: Critical Terrain. M Hobbs, C Rice, eds. Toronto: Women's Press 2018;465-  
6  
7 479.  
8  
9  
10  
11  
12  
13  
14  
15  
16  
17  
18  
19  
20  
21  
22  
23  
24  
25  
26  
27  
28  
29  
30  
31  
32  
33  
34  
35  
36  
37  
38  
39  
40  
41  
42  
43  
44  
45  
46  
47  
48  
49  
50  
51  
52  
53  
54  
55  
56  
57  
58  
59  
60

For peer review only

1  
2  
3 **Figure legends**  
4  
5  
6  
7

8 **Figure 1:** Women having undertaken mammography, by age group (%)  
9

10  
11  
12 Note: 4,433 women in total.  
13  
14  
15

16  
17 **Figure 2:** Women with and without mobility impairment having undertaken  
18  
19 mammography, by age group (%)  
20  
21  
22

23 Note 1: 3,145 women without mobility impairment and 1,288 women with mobility  
24  
25 impairment.  
26

27 Note 2: Differences are statistically significant.  
28  
29  
30  
31  
32  
33  
34  
35  
36  
37  
38  
39  
40  
41  
42  
43  
44  
45  
46  
47  
48  
49  
50  
51  
52  
53  
54  
55  
56  
57  
58  
59  
60

1  
2  
3  
4  
5  
6  
7  
8  
9  
10  
11  
12  
13  
14  
15  
16  
17  
18  
19  
20  
21  
22  
23  
24  
25  
26  
27  
28  
29  
30  
31  
32  
33  
34  
35  
36  
37  
38  
39  
40  
41  
42  
43  
44  
45  
46  
47  
48  
49  
50  
51  
52  
53  
54  
55  
56  
57  
58  
59  
60



Women having undertaken mammography, by age group (%)

197x144mm (120 x 120 DPI)



Women with and without mobility impairment having undertaken mammography, by age group (%)

255x151mm (120 x 120 DPI)

STROBE Statement—Checklist of items that should be included in reports of *cross-sectional studies*

|                          | Item No          | Recommendation                                                                                                                                                                                                 |
|--------------------------|------------------|----------------------------------------------------------------------------------------------------------------------------------------------------------------------------------------------------------------|
| Title and abstract       | X 1              | X p.1 (a) Indicate the study's design with a commonly used term in the title or the abstract                                                                                                                   |
|                          |                  | X p.2 (b) Provide in the abstract an informative and balanced summary of what was done and what was found                                                                                                      |
| <b>Introduction</b>      |                  |                                                                                                                                                                                                                |
| Background/rationale     | X p.4-5 2        | Explain the scientific background and rationale for the investigation being reported                                                                                                                           |
| Objectives               | X p.6 3          | State specific objectives, including any prespecified hypotheses                                                                                                                                               |
| <b>Methods</b>           |                  |                                                                                                                                                                                                                |
| Study design             | X p.2, p.6 4     | Present key elements of study design early in the paper                                                                                                                                                        |
| Setting                  | X p.6-7 5        | Describe the setting, locations, and relevant dates, including periods of recruitment, exposure, follow-up, and data collection                                                                                |
| Participants             | X p. 7-8 6       | (a) Give the eligibility criteria, and the sources and methods of selection of participants                                                                                                                    |
| Variables                | X p. 8-9 7       | Clearly define all outcomes, exposures, predictors, potential confounders, and effect modifiers. Give diagnostic criteria, if applicable                                                                       |
| Data sources/measurement | X p. 8-9 8*      | For each variable of interest, give sources of data and details of methods of assessment (measurement). Describe comparability of assessment methods if there is more than one group                           |
| Bias                     | X p. 14 9        | Describe any efforts to address potential sources of bias                                                                                                                                                      |
| Study size               | X p. 8-9 10      | Explain how the study size was arrived at                                                                                                                                                                      |
| Quantitative variables   | X p. 8-9 11      | Explain how quantitative variables were handled in the analyses. If applicable, describe which groupings were chosen and why                                                                                   |
| Statistical methods      | X 12             | X p. 6-8 (a) Describe all statistical methods, including those used to control for confounding                                                                                                                 |
|                          |                  | (b) Describe any methods used to examine subgroups and interactions                                                                                                                                            |
|                          |                  | X p.8-9 (c) Explain how missing data were addressed                                                                                                                                                            |
|                          |                  | (d) If applicable, describe analytical methods taking account of sampling strategy                                                                                                                             |
|                          |                  | (e) Describe any sensitivity analyses                                                                                                                                                                          |
| <b>Results</b>           |                  |                                                                                                                                                                                                                |
| Participants             | X 13*            | X p. 8 (a) Report numbers of individuals at each stage of study—eg numbers potentially eligible, examined for eligibility, confirmed eligible, included in the study, completing follow-up, and analysed       |
|                          |                  | (b) Give reasons for non-participation at each stage                                                                                                                                                           |
|                          |                  | (c) Consider use of a flow diagram                                                                                                                                                                             |
| Descriptive data         | X 14*            | X p.9-10 (a) Give characteristics of study participants (eg demographic, clinical, social) and information on exposures and potential confounders                                                              |
|                          |                  | (b) Indicate number of participants with missing data for each variable of interest                                                                                                                            |
| Outcome data             | X p. 8 15*       | Report numbers of outcome events or summary measures                                                                                                                                                           |
| Main results             | X p.12, p. 13 16 | X (a) Give unadjusted estimates and, if applicable, confounder-adjusted estimates and their precision (eg, 95% confidence interval). Make clear which confounders were adjusted for and why they were included |



|                          |                         |                                                                                                                                                                            |
|--------------------------|-------------------------|----------------------------------------------------------------------------------------------------------------------------------------------------------------------------|
|                          |                         | <b>X p.9 (b)</b> Report category boundaries when continuous variables were categorized                                                                                     |
|                          |                         | (c) If relevant, consider translating estimates of relative risk into absolute risk for a meaningful time period                                                           |
| Other analyses           | 17                      | Report other analyses done—eg analyses of subgroups and interactions, and sensitivity analyses                                                                             |
| <b>Discussion</b>        |                         |                                                                                                                                                                            |
| Key results              | <b>X p.14</b><br>18     | Summarise key results with reference to study objectives                                                                                                                   |
| Limitations              | <b>X p.14</b><br>19     | Discuss limitations of the study, taking into account sources of potential bias or imprecision. Discuss both direction and magnitude of any potential bias                 |
| Interpretation           | <b>X p. 16-17</b><br>20 | Give a cautious overall interpretation of results considering objectives, limitations, multiplicity of analyses, results from similar studies, and other relevant evidence |
| Generalisability         | <b>X p.14</b><br>21     | Discuss the generalisability (external validity) of the study results                                                                                                      |
| <b>Other information</b> |                         |                                                                                                                                                                            |
| Funding                  | <b>X p.17</b><br>22     | Give the source of funding and the role of the funders for the present study and, if applicable, for the original study on which the present article is based              |

\*Give information separately for exposed and unexposed groups.

**Note:** An Explanation and Elaboration article discusses each checklist item and gives methodological background and published examples of transparent reporting. The STROBE checklist is best used in conjunction with this article (freely available on the Web sites of PLoS Medicine at <http://www.plosmedicine.org/>, Annals of Internal Medicine at <http://www.annals.org/>, and Epidemiology at <http://www.epidem.com/>). Information on the STROBE Initiative is available at [www.strobe-statement.org](http://www.strobe-statement.org).
